# Supplementary material for: In silico prediction of chemical genotoxicity using machine learning methods and structural alerts
Source: Royal Society of Chemistry journal article supplement (doi:10.1039/c7tx00259a), 2017-12-15
Supplement: c7tx00259a2.xlsx [file c7tx00259a2.xlsx]

## Sheet: training set
Table SI1: The SMILES string, classification, CAS number and names for the training set and external validation set
The SMILES string, classification, CAS number and names for the training set
No.	CAS	Name	SMILES	Classification
1	50-07-7	Mitomycin C	COC12C3NC3CN1C4=C(C2COC(=O)N)C(=O)C(=C(C)C4=O)N	positive
2	69-05-6	N'-(6-chloro-2-methoxyacridin-9-yl)-N,N-diethylpentane-1,4-diamine dihydrochloride	CCN(CC)CCCC(C)Nc1c2ccc(Cl)cc2nc3ccc(OC)cc13	positive
3	75-05-8	Acetonitrile	CC#N	positive
4	77-09-8	3,3-bis(4-hydroxyphenyl)-2-benzofuran-1-one	Oc1ccc(cc1)C2(OC(=O)c3ccccc23)c4ccc(O)cc4	positive
5	79-06-1	prop-2-enamide	NC(=O)C=C	positive
6	98-01-1	furan-2-carbaldehyde	O=Cc1occc1	positive
7	99-09-2	3-Nitroaniline	Nc1cccc(c1)[N+](=O)[O-]	positive
8	2095-06-9	N,N-bis(oxiran-2-ylmethyl)aniline	C(C1CO1)N(CC2CO2)c3ccccc3	positive
9	2871-01-4	2-[(4-amino-2-nitrophenyl)amino]ethanol	Nc1ccc(NCCO)c(c1)[N+](=O)[O-]	positive
10	7314-06-9	4,4'-Diaminostilbene	Nc1ccc(C=Cc2ccc(N)cc2)cc1	positive
11	100-00-5	1-Chloro-4-nitrobenzene	[O-][N+](=O)c1ccc(Cl)cc1	positive
12	100-63-0	PHENYLHYDRAZINE HYDROCHLORIDE	NNc1ccccc1	positive
13	101-80-4	4-(4-aminophenoxy)aniline	Nc1ccc(Oc2ccc(N)cc2)cc1	positive
14	103-33-3	di(phenyl)diazene	c1ccc(cc1)N=Nc2ccccc2	positive
15	103-84-4	N-Phenylacetamide	CC(=O)Nc1ccccc1	positive
16	10605-21-7	methyl N-(1H-benzimidazol-2-yl)carbamate	COC(=O)Nc1nc2ccccc2[nH]1	positive
17	106-51-4	cyclohexa-2,5-diene-1,4-dione	O=C1C=CC(=O)C=C1	positive
18	106-91-2	oxiran-2-ylmethyl 2-methylprop-2-enoate	CC(=C)C(=O)OCC1CO1	positive
19	114-26-1	(2-propan-2-yloxyphenyl) N-methylcarbamate	CNC(=O)Oc1ccccc1OC(C)C	positive
20	115-02-6	(E)-1-(2-amino-3-hydroxy-3-oxopropoxy)-2-diazonioethenolate	NC(COC(=O)C=[N+]=[N-])C(=O)O	positive
21	115459-65-9	[2-oxiran-2-yl]methyl 4-nitrobenzoate	[O-][N+](=O)c1ccc(cc1)C(=O)OCC2CO2	positive
22	115-96-8	Tris(2-chloroethyl) phosphate	ClCCOP(=O)(OCCCl)OCCCl	positive
23	117-10-2	1,8-Dihydroxyanthracene-9,10-dione	Oc1cccc2C(=O)c3cccc(O)c3C(=O)c12	positive
24	117-89-5	10-[3-(4-methylpiperazin-1-yl)propyl]-2-(trifluoromethyl)phenothiazine	CN1CCN(CCCN2c3ccccc3Sc4ccc(cc24)C(F)(F)F)CC1	positive
25	118-71-8	3-hydroxy-2-methylpyran-4-one	CC1=C(O)C(=O)C=CO1	positive
26	119-93-7	4-(4-amino-3-methylphenyl)-2-methylaniline	Cc1cc(ccc1N)c2ccc(N)c(C)c2	positive
27	120-80-9	benzene-1,2-diol	Oc1ccccc1O	positive
28	123-31-9	Benzene-1,4-diol	Oc1ccc(O)cc1	positive
29	126-72-7	tris(2,3-dibromopropoxy)-hydroxyphosphanium	BrCC(Br)COP(=O)(OCC(Br)CBr)OCC(Br)CBr	positive
30	126-85-2	2-chloro-N-(2-chloroethyl)-N-methylethanamine oxide	C[N+]([O-])(CCCl)CCCl	positive
31	127-07-1	Hydroxyurea	NC(=O)NO	positive
32	128714-76-1	3,6-dinitrobenzo[a]pyrene	[O-][N+](=O)c1ccc2ccc3c4ccccc4c(c5ccc1c2c35)[N+](=O)[O-]	positive
33	128-95-0	1,4-diaminoanthracene-9,10-dione	Nc1ccc(N)c2C(=O)c3ccccc3C(=O)c12	positive
34	129-73-7	4-[(4-dimethylaminophenyl)-phenylmethyl]-N,N-dimethylaniline	CN(C)c1ccc(cc1)C(c2ccccc2)c3ccc(cc3)N(C)C	positive
35	13010-20-3	Nitrosourea	NC(=O)NN=O	positive
36	13056-98-9	N-ethyl-N-phenyldiazenylethanamine	CCN(CC)N=Nc1ccccc1	positive
37	13171-21-6	(3-chloro-4-diethylamino-4-oxobut-2-en-2-yl) dimethyl phosphate	CCN(CC)C(=O)C(=C(C)OP(=O)(OC)OC)Cl	positive
38	136-35-6	N-phenyldiazenylaniline	N(N=Nc1ccccc1)c2ccccc2	positive
39	137-26-8	dimethylcarbamothioylsulfanyl dimethylaminomethanedithioate	CN(C)C(=S)SSC(=S)N(C)C	positive
40	14047-09-7	Bis(3,4-dichlorophenyl)diazene	Clc1ccc(cc1Cl)N=Nc2ccc(Cl)c(Cl)c2	positive
41	14073-00-8	3-methyl-4-nitro-1-oxidoquinolin-1-ium	Cc1c[n+]([O-])c2ccccc2c1[N+](=O)[O-]	positive
42	140-79-4	1,4-Dinitrosopiperazine	O=NN1CCN(CC1)N=O	positive
43	148-79-8	2-(1,3-THIAZOL-4-YL)-1H-BENZIMIDAZOLE	c1ccc2[nH]c(nc2c1)c3cscn3	positive
44	148-82-3	2-amino-3-[4-[bis(2-chloroethyl)amino]phenyl]propanoic acid	NC(Cc1ccc(cc1)N(CCCl)CCCl)C(=O)O	positive
45	148-97-0	azane; N-hydroxy-N-phenylnitrous amide	ON(N=O)c1ccccc1	positive
46	14998-27-7	Chlorite	OCl=O	positive
47	150-68-5	3-(4-Chlorophenyl)-1,1-dimethylurea	CN(C)C(=O)Nc1ccc(Cl)cc1	positive
48	156-57-0	2-Aminoethanethiol hydrochloride	NCCS	positive
49	15805-73-9	Ethenyl carbamate	NC(=O)OC=C	positive
50	159394-71-5	3-[(E)-2-(4-nitrophenyl)ethenyl]benzonitrile	[O-][N+](=O)c1ccc(C=Cc2cccc(c2)C#N)cc1	positive
51	159394-73-7	4-[(Z)-2-(4-nitrophenyl)ethenyl]benzonitrile	[O-][N+](=O)c1ccc(C=Cc2ccc(cc2)C#N)cc1	positive
52	15972-60-8	2-chloro-N-(2,6-diethylphenyl)-N-(methoxymethyl)acetamide	CCc1cccc(CC)c1N(COC)C(=O)CCl	positive
53	16338-97-9	N,N-di(prop-2-enyl)nitrous amide	C=CCN(CC=C)N=O	positive
54	16752-77-5	(1-methylsulfanylethylideneamino) N-methylcarbamate	CNC(=O)ON=C(C)SC	positive
55	17117-34-9	3-Nitrobenzanthrone	[O-][N+](=O)c1ccc2c3ccccc3C(=O)c4cccc1c24	positive
56	17309-86-3	4-(1H-indazol-5-yldiazenyl)-N,N-dimethylaniline	CN(C)c1ccc(cc1)N=Nc2ccc3[nH]ncc3c2	positive
57	18463-85-9	4-(1,3-benzothiazol-6-yldiazenyl)-N,N-dimethylaniline	CN(C)c1ccc(cc1)N=Nc2ccc3ncsc3c2	positive
58	18463-90-6	4-(1,3-benzothiazol-5-yldiazenyl)-N,N-dimethylaniline	CN(C)c1ccc(cc1)N=Nc2ccc3scnc3c2	positive
59	1912-24-9	6-chloro-N'-ethyl-N-propan-2-yl-1,3,5-triazine-2,4-diamine	CCNc1nc(Cl)nc(NC(C)C)n1	positive
60	19387-91-8	1-(2-ethylsulfonylethyl)-2-methyl-5-nitroimidazole	CCS(=O)(=O)CCn1c(C)ncc1[N+](=O)[O-]	positive
61	194-59-2	7H-Dibenzo[c,g]carbazole	c1ccc2c(c1)ccc3[nH]c4ccc5ccccc5c4c23	positive
62	19622-55-0	5-(1-methyl-5-nitroimidazol-2-yl)-1,3,4-thiadiazol-2-amine	Cn1c(ncc1[N+](=O)[O-])c2nnc(N)s2	positive
63	19992-69-9	N-methyl-N-pyridin-3-yldiazenylmethanamine	CN(C)N=Nc1cccnc1	positive
64	20325-40-0	4-(4-amino-3-methoxyphenyl)-2-methoxyaniline dihydrochloride	COc1cc(ccc1N)c2ccc(N)c(OC)c2	positive
65	20769-85-1	2-bromo-2-methylpropanoyl bromide	CC(C)(Br)C(=O)Br	positive
66	22089-22-1	(2S)-N,N,3-tris(2-chloroethyl)-2-oxo-1-oxa-3-aza-2$l^{5}-phosphacyclohexan-2-amine	ClCCN(CCCl)P1(=O)OCCCN1CCCl	positive
67	2227-79-4	Benzenecarbothioamide	NC(=S)c1ccccc1	positive
68	22994-85-0	2-(2-nitroimidazol-1-yl)-N-(phenylmethyl)acetamide	[O-][N+](=O)c1nccn1CC(=O)NCc2ccccc2	positive
69	2314-97-8	trifluoro-iodomethane	FC(F)(F)I	positive
70	23214-92-8	(7,9)-7-[(2R,4S,5S,6S)-4-amino-5-hydroxy-6-methyloxan-2-yl]oxy-6,9,11-trihydroxy-9-(2-hydroxyacetyl)-4-methoxy-8,10-dihydro-7H-tetracene-5,12-dione	COc1cccc2C(=O)c3c(O)c4CC(O)(CC(OC5CC(N)C(O)C(C)O5)c4c(O)c3C(=O)c12)C(=O)CO	positive
71	23246-96-0	riddelline	CC=C1CC(=C)C(O)(CO)C(=O)OCC2=CCN3CCC(OC1=O)C23	positive
72	23256-30-6	N-(3-methyl-1,1-dioxo-1,4-thiazinan-4-yl)-1-(5-nitrofuran-2-yl)methanimine	CC1CS(=O)(=O)CCN1N=Cc2oc(cc2)[N+](=O)[O-]	positive
73	23696-28-8	N-(2-hydroxyethyl)-3-methyl-4-oxido-1-oxoquinoxalin-1-ium-2-carboxamide	Cc1c(C(=O)NCCO)[n+]([O-])c2ccccc2[n+]1[O-]	positive
74	23981-80-8	2-(6-methoxynaphthalen-2-yl)propanoic acid	COc1ccc2cc(ccc2c1)C(C)C(=O)O	positive
75	2451-62-9	1,3,5-tris(oxiran-2-ylmethyl)-1,3,5-triazinane-2,4,6-trione	O=C1N(CC2CO2)C(=O)N(CC3CO3)C(=O)N1CC4CO4	positive
76	24584-09-6	4-[(2S)-1-(3,5-dioxopiperazin-1-yl)propan-2-yl]piperazine-2,6-dione	CC(CN1CC(=O)NC(=O)C1)N2CC(=O)NC(=O)C2	positive
77	2461-42-9	2-(naphthalen-1-yloxymethyl)oxirane	C(Oc1cccc2ccccc12)C3CO3	positive
78	24905-87-1	2-[(4-amino-3-nitrophenyl)amino]ethanol	Nc1ccc(NCCO)cc1[N+](=O)[O-]	positive
79	2646-17-5	1-[(2-methylphenyl)hydrazinylidene]naphthalen-2-one	Cc1ccccc1NN=C2C(=O)C=Cc3ccccc23	positive
80	26761-45-5	oxiran-2-ylmethyl 2-ethyl-2,5-dimethylhexanoate	CCC(C)(CCC(C)C)C(=O)OCC1CO1	positive
81	26907-37-9	N,N'-bis(1,3,4-thiadiazol-2-yl)methanediamine	C(Nc1nncs1)Nc2nncs2	positive
82	2832-19-1	2-Chloro-N-(hydroxymethyl)acetamide	OCNC(=O)CCl	positive
83	29539-03-5	2,3-dihydro-1H-indole-5,6-diol	Oc1cc2CCNc2cc1O	positive
84	2968-28-7	5-fluoro-1-[4-hydroxy-5-(hydroxymethyl)oxolan-2-yl]pyrimidine-2,4-dione	OCC1OC(CC1O)N2C=C(F)C(=O)NC2=O	positive
85	298-02-2	diethoxy-(ethylsulfanylmethylsulfanyl)-sulfanylidenephosphorane	CCOP(=S)(OCC)SCSCC	positive
86	298-18-0	2-(oxiran-2-yl)oxirane	C1OC1C2CO2	positive
87	300-62-9	1-phenylpropan-2-amine	CC(N)Cc1ccccc1	positive
88	301-12-2	1-dimethoxyphosphorylsulfanyl-2-ethylsulfinylethane	CCS(=O)CCSP(=O)(OC)OC	positive
89	302-01-2	Hydrazine	NN	positive
90	305-03-3	4-[4-[bis(2-chloroethyl)amino]phenyl]butanoic acid	OC(=O)CCCc1ccc(cc1)N(CCCl)CCCl	positive
91	30516-87-1	1-[(2R,4S,5S)-4-azido-5-(hydroxymethyl)oxolan-2-yl]-5-methylpyrimidine-2,4-dione	CC1=CN(C2CC(N=[N+]=[N-])C(CO)O2)C(=O)NC1=O	positive
92	3068-88-0	4-Methyloxetan-2-one	CC1CC(=O)O1	positive
93	3105-97-3	1-(2-diethylaminoethylamino)-4-(hydroxymethyl)thioxanthen-9-one	CCN(CC)CCNc1ccc(CO)c2Sc3ccccc3C(=O)c12	positive
94	31431-39-7	methyl N-[6-(benzoyl)-1H-benzimidazol-2-yl]carbamate	COC(=O)Nc1nc2ccc(cc2[nH]1)C(=O)c3ccccc3	positive
95	3179-89-3	2-[2-hydroxyethyl-[4-methyl-3-(4-nitrophenyl)diazenylphenyl]amino]ethanol	Cc1ccc(cc1N=Nc2ccc(cc2)[N+](=O)[O-])N(CCO)CCO	positive
96	320-67-2	4-amino-1-[(2R,3R,4S,5R)-3,4-dihydroxy-5-(hydroxymethyl)oxolan-2-yl]-1,3,5-triazin-2-one	NC1=NC(=O)N(C=N1)C2OC(CO)C(O)C2O	positive
97	3252-43-5	2,2-dibromoacetonitrile	BrC(Br)C#N	positive
98	3597-91-9	(4-phenylphenyl)methanol	OCc1ccc(cc1)c2ccccc2	positive
99	36791-04-5	1-[(2R,3R,4S,5R)-3,4-dihydroxy-5-(hydroxymethyl)oxolan-2-yl]-1,2,4-triazole-3-carboxamide	NC(=O)c1ncn(n1)C2OC(CO)C(O)C2O	positive
100	37517-30-9	N-[3-acetyl-4-[2-hydroxy-3-(propan-2-ylamino)propoxy]phenyl]butanamide	CCCC(=O)Nc1ccc(OCC(O)CNC(C)C)c(c1)C(=O)C	positive
101	3778-73-2	(2S)-N,3-bis(2-chloroethyl)-2-oxo-1-oxa-3-aza-2$l^{5}-phosphacyclohexan-2-amine	ClCCNP1(=O)OCCCN1CCCl	positive
102	38434-77-4	ethyl-nitrosocyanamide	CCN(N=O)C#N	positive
103	386-68-5	5-fluoro-1H-quinolin-4-one	Fc1cccc2ncccc12	positive
104	4097-22-7	[(2,5)-5-(6-aminopurin-9-yl)oxolan-2-yl]methanol	Nc1ncnc2c1ncn2C3CCC(CO)O3	positive
105	4164-28-7	N,N-dimethylnitramide	CN(C)[N+](=O)[O-]	positive
106	41941-56-4	8-(6-amino-8-chloropurin-9-yl)-3-hydroxy-3-oxo-2,4,7-trioxa-3$l^{5}-phosphabicyclo[4.3.0]nonan-9-ol	Nc1ncnc2c1nc(Cl)n2C3OC4COP(=O)(O)OC4C3O	positive
107	42397-64-8	1,6-DINITROPYRENE	[O-][N+](=O)c1ccc2ccc3c(ccc4ccc1c2c34)[N+](=O)[O-]	positive
108	42397-65-9	1,8-DINITROPYRENE	[O-][N+](=O)c1ccc2ccc3ccc(c4ccc1c2c34)[N+](=O)[O-]	positive
109	446-86-6	6-(3-methyl-5-nitroimidazol-4-yl)sulfanyl-7H-purine	Cn1cnc(c1Sc2ncnc3nc[nH]c23)[N+](=O)[O-]	positive
110	476-28-8	Amaryline	OC1C=C2CCN3Cc4cc5OCOc5cc4C(C1O)C23	positive
111	484-23-1	(4-hydrazinylphthalazin-1-yl)hydrazine	NNc1nnc(NN)c2ccccc12	positive
112	4926-55-0	2-[(2-nitrophenyl)amino]ethanol	OCCNc1ccccc1[N+](=O)[O-]	positive
113	496-72-0	4-methylbenzene-1,2-diamine	Cc1ccc(N)c(N)c1	positive
114	50-00-0	FORMALDEHYDE	C=O	positive
115	501-16-6	(E)-3-(3,4-dihydroxyphenyl)prop-2-enoic acid	OC(=O)C=Cc1ccc(O)c(O)c1	positive
116	50-18-0	(2S)-N,N-bis(2-chloroethyl)-2-oxo-1-oxa-3-aza-2$l^{5}-phosphacyclohexan-2-amine	ClCCN(CCCl)P1(=O)NCCCO1	positive
117	50-44-2	3,7-dihydropurine-6-thione	S=C1N=CNc2nc[nH]c12	positive
118	51-18-3	2,4,6-tris(aziridin-1-yl)-1,3,5-triazine	C1CN1c2nc(nc(n2)N3CC3)N4CC4	positive
119	51-21-8	5-fluoro-1H-pyrimidine-2,4-dione	FC1=CNC(=O)NC1=O	positive
120	51264-14-3	N-[4-(acridin-9-ylamino)-3-methoxyphenyl]methanesulfonamide	COc1cc(NS(=O)(=O)C)ccc1Nc2c3ccccc3nc4ccccc24	positive
121	51630-58-1	[cyano-[3-(phenoxy)phenyl]methyl] 2-(4-chlorophenyl)-3-methylbutanoate	CC(C)C(C(=O)OC(C#N)c1cccc(Oc2ccccc2)c1)c3ccc(Cl)cc3	positive
122	51-71-8	2-Phenylethylhydrazine	NNCCc1ccccc1	positive
123	51-79-6	Ethyl carbamate	CCOC(=O)N	positive
124	518-28-5	Podophyllotoxin	COc1cc(cc(OC)c1OC)C2C3C(COC3=O)C(O)c4cc5OCOc5cc24	positive
125	51-98-9	[(8R,9S,10R,13S,14S,17R)-17-ethynyl-13-methyl-3-oxo-1,2,6,7,8,9,10,11,12,14,15,16-dodecahydrocyclopenta[a]phenanthren-17-yl] acetate	CC(=O)OC1(CCC2C3CCC4=CC(=O)CCC4C3CCC12C)C#C	positive
126	520-18-3	3,5,7-trihydroxy-2-(4-hydroxyphenyl)chromen-4-one	OC1=C(Oc2cc(O)cc(O)c2C1=O)c3ccc(O)cc3	positive
127	520-45-6	3-acetyl-6-methylpyran-2,4-dione	CC(=O)C1C(=O)OC(=CC1=O)C	positive
128	52136-25-1	2-[[4-(bis(2-hydroxyethyl)amino)phenyl]amino]-5-(2-hydroxyethylamino)cyclohexa-2,5-diene-1,4-dione	OCCNC1=CC(=O)C(=CC1=O)Nc2ccc(cc2)N(CCO)CCO	positive
129	52-24-4	tris(aziridin-1-yl)-sulfanylidenephosphorane	S=P(N1CC1)(N2CC2)N3CC3	positive
130	5255-75-4	2-[(4-nitrophenoxy)methyl]oxirane	[O-][N+](=O)c1ccc(OCC2CO2)cc1	positive
131	525-66-6	1-naphthalen-1-yloxy-3-(propan-2-ylamino)propan-2-ol	CC(C)NCC(O)COc1cccc2ccccc12	positive
132	52-86-8	4-[4-(4-chlorophenyl)-4-hydroxypiperidin-1-yl]-1-(4-fluorophenyl)butan-1-one	OC1(CCN(CCCC(=O)c2ccc(F)cc2)CC1)c3ccc(Cl)cc3	positive
133	5336-53-8	N,N-bis(phenylmethyl)nitrous amide	O=NN(Cc1ccccc1)Cc2ccccc2	positive
134	53-70-3	naphtho[1,2-b]phenanthrene	c1ccc2c(c1)ccc3cc4c(ccc5ccccc45)cc23	positive
135	53910-25-1	(8)-3-[(2,4,5)-4-hydroxy-5-(hydroxymethyl)oxolan-2-yl]-7,8-dihydro-4H-imidazo[4,5-f][1,3]diazepin-8-ol	OCC1OC(CC1O)n2cnc3C(O)CN=CNc23	positive
136	53-96-3	N-(9H-Fluoren-2-yl)acetamide	CC(=O)Nc1ccc2c(Cc3ccccc23)c1	positive
137	54029-12-8	methyl N-(6-propylsulfinyl-1H-benzimidazol-2-yl)carbamate	CCCS(=O)c1ccc2nc(NC(=O)OC)[nH]c2c1	positive
138	54-42-2	1-[4-hydroxy-5-(hydroxymethyl)oxolan-2-yl]-5-iodopyrimidine-2,4-dione	OCC1OC(CC1O)N2C=C(I)C(=O)NC2=O	positive
139	545-55-1	1-[bis(aziridin-1-yl)phosphoryl]aziridine	O=P(N1CC1)(N2CC2)N3CC3	positive
140	54827-17-7	4-(4-amino-3,5-dimethylphenyl)-2,6-dimethylaniline	Cc1cc(cc(C)c1N)c2cc(C)c(N)c(C)c2	positive
141	54965-21-8	methyl N-(6-propylsulfanyl-1H-benzimidazol-2-yl)carbamate	CCCSc1ccc2nc(NC(=O)OC)[nH]c2c1	positive
142	551-92-8	1,2-Dimethyl-5-nitroimidazole	Cc1ncc([N+](=O)[O-])n1C	positive
143	55-38-9	dimethoxy-(3-methyl-4-methylsulfanylphenoxy)-sulfanylidenephosphorane	COP(=S)(OC)Oc1ccc(SC)c(C)c1	positive
144	55557-00-1	1,4-dinitroso-1,4-diazepane	O=NN1CCCN(CC1)N=O	positive
145	556-52-5	oxiran-2-ylmethanol	OCC1CO1	positive
146	55738-54-0	N,N-dimethyl-N'-[5-[2-(5-nitrofuran-2-yl)ethenyl]-1,3,4-oxadiazol-2-yl]methanimidamide	CN(C)C=Nc1oc(C=Cc2oc(cc2)[N+](=O)[O-])nn1	positive
147	56-53-1	4-[(E)-4-(4-hydroxyphenyl)hex-3-en-3-yl]phenol	CCC(=C(CC)c1ccc(O)cc1)c2ccc(O)cc2	positive
148	56-57-5	4-nitro-1-oxidoquinolin-1-ium	[O-][N+](=O)c1cc[n+]([O-])c2ccccc12	positive
149	56654-52-5	1,3-Dibutyl-1-nitrosourea	CCCCNC(=O)N(CCCC)N=O	positive
150	56-72-4	3-chloro-7-diethoxyphosphinothioyloxy-4-methylchromen-2-one	CCOP(=S)(OCC)Oc1ccc2C(=C(Cl)C(=O)Oc2c1)C	positive
151	57-39-6	1-bis(2-methylaziridin-1-yl)phosphoryl-2-methylaziridine	CC1CN1P(=O)(N2CC2C)N3CC3C	positive
152	57-44-3	5,5-diethyl-1,3-diazinane-2,4,6-trione	CCC1(CC)C(=O)NC(=O)NC1=O	positive
153	57808-66-9	6-chloro-3-[1-[3-(2-oxo-3H-benzimidazol-1-yl)propyl]piperidin-4-yl]-1H-benzimidazol-2-one	Clc1ccc2N(C3CCN(CCCN4C(=O)Nc5ccccc45)CC3)C(=O)Nc2c1	positive
154	589-41-3	Ethyl N-hydroxycarbamate	CCOC(=O)NO	positive
155	59-14-3	5-bromo-1-[4-hydroxy-5-(hydroxymethyl)oxolan-2-yl]pyrimidine-2,4-dione	OCC1OC(CC1O)N2C=C(Br)C(=O)NC2=O	positive
156	59277-89-3	2-amino-9-(2-hydroxyethoxymethyl)-3H-purin-6-one	NC1=NC(=O)c2ncn(COCCO)c2N1	positive
157	59820-43-8	2-[2-(2-hydroxyethylamino)-5-nitrophenoxy]ethanol	OCCNc1ccc(cc1OCCO)[N+](=O)[O-]	positive
158	602-87-9	5-Nitroacenaphthene	[O-][N+](=O)c1ccc2CCc3cccc1c23	positive
159	606-20-2	2-Methyl-1,3-dinitrobenzene	Cc1c(cccc1[N+](=O)[O-])[N+](=O)[O-]	positive
160	607-59-0	N,N-dimethyl-4-naphthalen-1-yldiazenylaniline	CN(C)c1ccc(cc1)N=Nc2cccc3ccccc23	positive
161	60902-28-5	N-(4-HYDROXYPHENYL)ACETAMIDE-2,2,2-D3	CC(=O)Nc1ccc(O)cc1	positive
162	609-20-1	2,6-Dichlorobenzene-1,4-diamine	Nc1cc(Cl)c(N)c(Cl)c1	positive
163	611-06-3	2,4-Dichloro-1-nitrobenzene	[O-][N+](=O)c1ccc(Cl)cc1Cl	positive
164	613-35-4	N-[4-(4-acetamidophenyl)phenyl]acetamide	CC(=O)Nc1ccc(cc1)c2ccc(NC(=O)C)cc2	positive
165	613-65-0	N,N-dimethyl-4-naphthalen-2-yldiazenylaniline	CN(C)c1ccc(cc1)N=Nc2ccc3ccccc3c2	positive
166	62-44-2	N-(4-Ethoxyphenyl)acetamide	CCOc1ccc(NC(=O)C)cc1	positive
167	6271-79-0	4-(4-amino-3-nitrophenyl)-2-nitroaniline	Nc1ccc(cc1[N+](=O)[O-])c2ccc(N)c(c2)[N+](=O)[O-]	positive
168	63-25-2	naphthalen-1-yl N-methylcarbamate	CNC(=O)Oc1cccc2ccccc12	positive
169	636-23-7	4-methylbenzene-1,3-diamine dihydrochloride	Cc1ccc(N)cc1N	positive
170	63-75-2	methyl 1-methyl-5,6-dihydro-2H-pyridine-3-carboxylate	COC(=O)C1=CCCN(C)C1	positive
171	64091-91-4	N-methyl-N-(4-oxo-4-pyridin-3-ylbutyl)nitrous amide	CN(CCCC(=O)c1cccnc1)N=O	positive
172	64-67-5	Diethyl sulfate	CCOS(=O)(=O)OCC	positive
173	64-77-7	1-butyl-3-(4-methylphenyl)sulfonylurea	CCCCNC(=O)NS(=O)(=O)c1ccc(C)cc1	positive
174	65-46-3	4-amino-1-[3,4-dihydroxy-5-(hydroxymethyl)oxolan-2-yl]pyrimidin-2-one	NC1=NC(=O)N(C=C1)C2OC(CO)C(O)C2O	positive
175	65884-46-0	2-cyano-N-[(E)-(1-hydroxy-4-oxidoquinoxalin-4-ium-2-ylidene)methyl]iminoacetamide	ON1C(=CN=NC(=O)CC#N)C=[N+]([O-])c2ccccc12	positive
176	65907-30-4	(2,2-dimethyl-3H-1-benzofuran-7-yl) N-(butoxycarbonyl-methylamino)sulfanyl-N-methylcarbamate	CCCCOC(=O)N(C)SN(C)C(=O)Oc1cccc2CC(C)(C)Oc12	positive
177	66-81-9	4-[(2)-2-[(1,3,5)-3,5-dimethyl-2-oxocyclohexyl]-2-hydroxyethyl]piperidine-2,6-dione	CC1CC(C)C(=O)C(C1)C(O)CC2CC(=O)NC(=O)C2	positive
178	680-31-9	N-bis(dimethylamino)phosphoryl-N-methylmethanamine	CN(C)P(=O)(N(C)C)N(C)C	positive
179	70-25-7	[[amino-(methyl-nitrosoamino)methylidene]amino]-hydroxy-oxoazanium	CN(N=O)C(=N[N+](=O)[O-])N	positive
180	71031-15-7	2-amino-1-phenylpropan-1-one	CC(N)C(=O)c1ccccc1	positive
181	720-69-4	6-(5-nitrofuran-2-yl)-1,3,5-triazine-2,4-diamine	Nc1nc(N)nc(n1)c2oc(cc2)[N+](=O)[O-]	positive
182	72254-58-1	acetic acid; 1-methyl-5H-pyrido[4,5-b]indol-3-amine	Cc1nc(N)cc2[nH]c3ccccc3c12	positive
183	7227-91-0	N-methyl-N-phenyldiazenylmethanamine	CN(C)N=Nc1ccccc1	positive
184	7481-89-2	4-amino-1-[(2,5)-5-(hydroxymethyl)oxolan-2-yl]pyrimidin-2-one	NC1=NC(=O)N(C=C1)C2CCC(CO)O2	positive
185	75-07-0	acetaldehyde	CC=O	positive
186	759-73-9	1-Ethyl-1-nitrosourea	CCN(N=O)C(=O)N	positive
187	76-43-7	(8S,9R,10S,11S,13S,14S,17S)-9-fluoro-11,17-dihydroxy-10,13,17-trimethyl-1,2,6,7,8,11,12,14,15,16-decahydrocyclopenta[a]phenanthren-3-one	CC1(O)CCC2C3CCC4=CC(=O)CCC4(C)C3(F)C(O)CC12C	positive
188	77-92-9	2-hydroxypropane-1,2,3-tricarboxylic acid	OC(=O)CC(O)(CC(=O)O)C(=O)O	positive
189	78-98-8	2-Oxopropanal	CC(=O)C=O	positive
190	80508-23-2	3-(1-nitrosopyrrolidin-2-yl)pyridine	O=NN1CCCC1c2cccnc2	positive
191	816-57-9	1-Nitroso-1-propylurea	CCCN(N=O)C(=O)N	positive
192	81-88-9	[9-(2-carboxyphenyl)-6-diethylaminoxanthen-3-ylidene]-diethylazanium chloride	CCN(CC)c1ccc2c(c3ccccc3C(=O)O)c4ccc(cc4[o+]c2c1)N(CC)CC	positive
193	823-40-5	2-methylbenzene-1,3-diamine	Cc1c(N)cccc1N	positive
194	82617-23-0	oxiran-2-yl carbamate	NC(=O)OC1CO1	positive
195	85721-33-1	1-cyclopropyl-6-fluoro-4-oxo-7-piperazin-1-ylquinoline-3-carboxylic acid	OC(=O)C1=CN(C2CC2)c3cc(N4CCNCC4)c(F)cc3C1=O	positive
196	87-66-1	BENZENE-1,2,3-TRIOL	Oc1cccc(O)c1O	positive
197	88255-01-0	2-[[(methoxycarbonylamino)-[(2-nitro-5-propylsulfanylphenyl)amino]methylidene]amino]ethanesulfonic acid	CCCSc1ccc(c(NC(=NCCS(=O)(=O)O)NC(=O)OC)c1)[N+](=O)[O-]	positive
198	89-61-2	1,4-Dichloro-2-nitrobenzene	[O-][N+](=O)c1cc(Cl)ccc1Cl	positive
199	91773-48-7	1,3,5,7-Tetraazatricyclo[3.3.1.13,7]decane	C1N2CN3CN(CN1C3)C2	positive
200	91-94-1	4-(4-amino-3-chlorophenyl)-2-chloroaniline	Nc1ccc(cc1Cl)c2ccc(N)c(Cl)c2	positive
201	92118-27-9	1-(2-chloroethyl)-3-(1-diethoxyphosphorylethyl)-1-nitrosourea	CCOP(=O)(OCC)C(C)NC(=O)N(CCCl)N=O	positive
202	92-62-6	acridine-3,6-diamine	Nc1ccc2cc3ccc(N)cc3nc2c1	positive
203	92-87-5	4-(4-aminophenyl)aniline	Nc1ccc(cc1)c2ccc(N)cc2	positive
204	92887-88-2	3-[[4-(1,3-benzothiazol-6-yldiazenyl)phenyl]-methylamino]propanenitrile	CN(CCC#N)c1ccc(cc1)N=Nc2ccc3ncsc3c2	positive
205	930-22-3	2-ethenyloxirane	C=CC1CO1	positive
206	94-20-2	1-(4-chlorophenyl)sulfonyl-3-propylurea	CCCNC(=O)NS(=O)(=O)c1ccc(Cl)cc1	positive
207	94-75-7	2,4-Dichlorophenoxyacetic acid	OC(=O)COc1ccc(Cl)cc1Cl	positive
208	94-78-0	3-phenyldiazenylpyridine-2,6-diamine	Nc1ccc(N=Nc2ccccc2)c(N)n1	positive
209	95120-45-9	(2R)-1-methoxy-3-(2-nitroimidazol-1-yl)propan-2-ol	COCC(O)Cn1ccnc1[N+](=O)[O-]	positive
210	95-54-5	benzene-1,2-diamine	Nc1ccccc1N	positive
211	95-83-0	4-chlorobenzene-1,2-diamine	Nc1ccc(Cl)cc1N	positive
212	97-74-5	dimethylcarbamothioyl dimethylaminomethanedithioate	CN(C)C(=S)SC(=S)N(C)C	positive
213	99-54-7	1,2-Dichloro-4-nitrobenzene	[O-][N+](=O)c1ccc(Cl)c(Cl)c1	positive
214	50-06-6	5-ethyl-5-phenyl-1,3-diazinane-2,4,6-trione	CCC1(C(=O)NC(=O)NC1=O)c2ccccc2	positive
215	121-75-5	diethyl 2-dimethoxyphosphinothioylsulfanylbutanedioate	CCOC(=O)CC(SP(=S)(OC)OC)C(=O)OCC	positive
216	125-33-7	5-ethyl-5-phenyl-1,3-diazinane-4,6-dione	CCC1(C(=O)NCNC1=O)c2ccccc2	positive
217	18774-85-1	1-Hexyl-1-nitrosourea	CCCCCCN(N=O)C(=O)N	positive
218	20199-04-6	phenyl-sulfinylmethanamine	NC(=S=O)c1ccccc1	positive
219	21340-68-1	methyl 2-[4-(4-chlorophenyl)phenoxy]-2-methylpropanoate	COC(C)C(O)(C(=O)OCC1=CCN2CCC(OC(=O)C(=CC)C)C12)C(C)(C)O	positive
220	24632-47-1	but-2-enedioic acid; 2-(4-methylpiperazin-1-yl)-N-[(5-nitrofuran-2-yl)methylideneamino]acetamide	CN1CCN(CC(=O)NN=Cc2oc(cc2)[N+](=O)[O-])CC1	positive
221	298-00-0	dimethoxy-(4-nitrophenoxy)-sulfanylidenephosphorane	COP(=S)(OC)Oc1ccc(cc1)[N+](=O)[O-]	positive
222	33389-33-2	2-(5-nitrothiophen-2-yl)-2,3-dihydro-1H-quinazolin-4-one	[O-][N+](=O)c1ccc(s1)C2NC(=O)c3ccccc3N2	positive
223	34237-98-4	4-(4-amino-3-bromophenyl)-2-bromoaniline	Nc1ccc(cc1Br)c2ccc(N)c(Br)c2	positive
224	3688-53-7	(Z)-2-furan-2-yl-3-(5-nitrofuran-2-yl)prop-2-enamide	NC(=O)C(=Cc1oc(cc1)[N+](=O)[O-])c2occc2	positive
225	448-97-5	4-(4-amino-3-fluorophenyl)-2-fluoroaniline	Nc1ccc(cc1F)c2ccc(N)c(F)c2	positive
226	5711-40-0	(E)-3-bromo-4-(4-methoxyphenyl)-4-oxobut-2-enoic acid	COc1ccc(cc1)C(=O)C(=CC(=O)O)Br	positive
227	78-34-2	(3-diethoxyphosphinothioylsulfanyl-1,4-dioxan-2-yl)sulfanyl-diethoxy-sulfanylidenephosphorane	CCOP(=S)(OCC)SC1OCCOC1SP(=S)(OCC)OCC	positive
228	83-67-0	3,7-dimethylpurine-2,6-dione	CN1C(=O)NC(=O)c2c1ncn2C	positive
229	86-54-4	phthalazin-1-ylhydrazine hydrochloride	NNc1nncc2ccccc12	positive
230	91-59-8	naphthalen-2-amine	Nc1ccc2ccccc2c1	positive
231	315-22-0	Monocrotaline	CC1C(=O)OC2CCN3CC=C(COC(=O)C(C)(O)C1(C)O)C23	positive
232	116-95-0	[4-[[4-(diethylamino)phenyl]-(2,4-disulfophenyl)methylidene]cyclohexa-2,5-dien-1-ylidene]-diethylazanium	CCN(CC)c1ccc(cc1)[C+](c2ccc(cc2)N(CC)CC)c3ccc(cc3S(=O)(=O)O)S(=O)(=O)O	positive
233	522-20-3	1-[(6-chloro-2-methoxyacridin-9-yl)amino]-3-(diethylamino)propan-2-ol	CCN(CC)CC(O)CNc1c2ccc(Cl)cc2nc3ccc(OC)cc13	positive
234	94421-90-6	3,3'-(((((4-(dimethylamino)phenyl)methylene)bis(4,1-phenylene))bis(ethylazanediyl))bis(methylene))dibenzenesulfonic acid	CCN(c1ccc(C(c2ccc(N(Cc3cc(S(=O)(O)=O)ccc3)CC)cc2)c4ccc(N(C)C)cc4)cc1)Cc5cc(S(=O)(O)=O)ccc5	positive
235	150-70-9	[4-(dimethylamino)phenyl]iminosulfamic acid	CN(C)c1ccc(cc1)N=NS(=O)(=O)O	positive
236	7239-21-6	(E)-1-(4-bromophenyl)-3,3-dimethyltriaz-1-ene	CN(C)N=Nc1ccc(Br)cc1	positive
237	3930-19-6	(4Z)-5-amino-6-(7-amino-6-methoxy-5,8-dioxoquinolin-2-yl)-4-(4,5-dimethoxy-6-oxocyclohexa-2,4-dien-1-ylidene)-3-methyl-1H-pyridine-2-carboxylic acid	COC1=C(OC)C(=O)C(=C2C(=C(NC(=C2N)c3ccc4C(=O)C(=C(N)C(=O)c4n3)OC)C(=O)O)C)C=C1	positive
238	1972-08-3	(6aR,10aR)-6,6,9-trimethyl-3-pentyl-6a,7,8,10a-tetrahydrobenzo[c]chromen-1-ol	CCCCCc1cc(O)c2C3C=C(C)CCC3C(C)(C)Oc2c1	negative
239	75-09-2	Dichloromethane	ClCCl	negative
240	79-07-2	2-Chloroacetamide	NC(=O)CCl	negative
241	79-09-4	Propanoic acid	CCC(=O)O	negative
242	96-09-3	2-Phenyloxirane	C1OC1c2ccccc2	negative
243	98-07-7	Trichloromethylbenzene	ClC(Cl)(Cl)c1ccccc1	negative
244	4454-05-1	2-Methoxy-3,4-dihydro-2H-pyran	COC1CCC=CO1	negative
245	100-21-0	Terephthalic acid	OC(=O)c1ccc(cc1)C(=O)O	negative
246	100-37-8	2-Diethylaminoethanol	CCN(CC)CCO	negative
247	100-41-4	Ethylbenzene	CCc1ccccc1	negative
248	100-42-5	Ethenylbenzene	C=Cc1ccccc1	negative
249	100-44-7	Chloromethylbenzene	ClCc1ccccc1	negative
250	100-46-9	phenylmethanamine	NCc1ccccc1	negative
251	100-64-1	N-cyclohexylidenehydroxylamine	ON=C1CCCCC1	negative
252	100-75-4	1-Nitrosopiperidine	O=NN1CCCCC1	negative
253	100-79-8	(2,2-Dimethyl-1,3-dioxolan-4-yl)methanol	CC1(C)OCC(CO)O1	negative
254	101-68-8	1-isocyanato-4-[(4-isocyanatophenyl)methyl]benzene	O=C=Nc1ccc(Cc2ccc(cc2)N=C=O)cc1	negative
255	101-83-7	N-Cyclohexylcyclohexanamine	C1CCC(CC1)NC2CCCCC2	negative
256	102-09-0	Diphenyl carbonate	O=C(Oc1ccccc1)Oc2ccccc2	negative
257	102-56-7	2,5-Dimethoxyaniline	COc1ccc(OC)c(N)c1	negative
258	102-71-6	2-(bis(2-hydroxyethynyl)amino)ethynol	OCCN(CCO)CCO	negative
259	102-82-9	N,N-dibutylbutan-1-amine	CCCCN(CCCC)CCCC	negative
260	103-23-1	Bis(2-ethylhexyl) hexanedioate	CCCCC(CC)COC(=O)CCCCC(=O)OCC(CC)CCCC	negative
261	103-60-6	2-(phenoxy)ethyl 2-methylpropanoate	CC(C)C(=O)OCCOc1ccccc1	negative
262	103-71-9	Isocyanatobenzene	O=C=Nc1ccccc1	negative
263	104-38-1	2-[4-(2-hydroxyethoxy)phenoxy]ethanol	OCCOc1ccc(OCCO)cc1	negative
264	104-55-2	(E)-3-phenylprop-2-enal	O=CC=Cc1ccccc1	negative
265	104-61-0	5-pentyloxolan-2-one	CCCCCC1CCC(=O)O1	negative
266	104-66-5	2-(phenoxy)ethoxybenzene	C(COc1ccccc1)Oc2ccccc2	negative
267	104-67-6	5-heptyloxolan-2-one	CCCCCCCC1CCC(=O)O1	negative
268	104-75-6	2-ethylhexan-1-amine	CCCCC(CC)CN	negative
269	104-76-7	2-Ethylhexan-1-ol	CCCCC(CC)CO	negative
270	104-93-8	1-Methoxy-4-methylbenzene	COc1ccc(C)cc1	negative
271	10508-09-5	2-methyl-2-(2-methylbutan-2-ylperoxy)butane	CCC(C)(C)OOC(C)(C)CC	negative
272	105-16-8	2-diethylaminoethyl 2-methylprop-2-enoate	CCN(CC)CCOC(=O)C(=C)C	negative
273	105-59-9	2-(2-hydroxyethyl-methylamino)ethanol	CN(CCO)CCO	negative
274	105-60-2	azepan-2-one	O=C1CCCCCN1	negative
275	105-83-9	N-(3-aminopropyl)-N-methylpropane-1,3-diamine	CN(CCCN)CCCN	negative
276	105-95-3	1,4-Dioxacycloheptadecane-5,17-dione	O=C1CCCCCCCCCCCC(=O)OCCO1	negative
277	105-99-7	Dibutyl hexanedioate	CCCCOC(=O)CCCCC(=O)OCCCC	negative
278	106-02-5	1-oxacyclohexadecan-2-one	O=C1CCCCCCCCCCCCCCO1	negative
279	106-22-9	(3R)-3,7-dimethyloct-6-en-1-ol	CC(CCO)CCC=C(C)C	negative
280	106-24-1	(2E)-3,7-dimethylocta-2,6-dien-1-ol	CC(=CCCC(=CCO)C)C	negative
281	106-42-3	1,4-Dimethylbenzene	Cc1ccc(C)cc1	negative
282	106-92-3	2-(prop-2-enoxymethyl)oxirane	C=CCOCC1CO1	negative
283	106-94-5	1-BROMOPROPANE	CCCBr	negative
284	107-05-1	3-Chloro-1-propene	ClCC=C	negative
285	107-11-9	prop-2-en-1-amine	NCC=C	negative
286	107-25-5	Methoxyethene	COC=C	negative
287	107-98-2	1-Methoxypropan-2-ol	COCC(C)O	negative
288	108-01-0	2-DIMETHYLAMINOETHANOL	CN(C)CCO	negative
289	108-10-1	4-Methylpentan-2-one	CC(C)CC(=O)C	negative
290	108-30-5	oxolane-2,5-dione	O=C1CCC(=O)O1	negative
291	108-60-1	1-chloro-2-(1-chloropropan-2-yloxy)propane	CC(CCl)OC(C)CCl	negative
292	108-93-0	Cyclohexanol	OC1CCCCC1	negative
293	109-13-7	tert-butyl 2-methylpropaneperoxoate	CC(C)C(=O)OOC(C)(C)C	negative
294	109-43-3	Dibutyl decanedioate	CCCCOC(=O)CCCCCCCCC(=O)OCCCC	negative
295	109-52-4	Pentanoic acid	CCCCC(=O)O	negative
296	109-55-7	N,N-dimethylpropane-1,3-diamine	CN(C)CCCN	negative
297	109-69-3	1-Chlorobutane	CCCCCl	negative
298	109-70-6	1-Bromo-3-chloropropane	ClCCCBr	negative
299	109-73-9	butan-1-amine	CCCCN	negative
300	110-05-4	2-tert-butylperoxy-2-methylpropane	CC(C)(C)OOC(C)(C)C	negative
301	110-33-8	Dihexyl hexanedioate	CCCCCCOC(=O)CCCCC(=O)OCCCCCC	negative
302	110-49-6	2-Methoxyethyl acetate	COCCOC(=O)C	negative
303	110553-27-0	2-methyl-4,6-bis(octylsulfanylmethyl)phenol	CCCCCCCCSCc1cc(C)c(O)c(CSCCCCCCCC)c1	negative
304	110-71-4	1,2-Dimethoxyethane	COCCOC	negative
305	110-82-7	Cyclohexane	C1CCCCC1	negative
306	110-88-3	1,3,5-Trioxane	C1OCOCO1	negative
307	111-21-7	2-[2-(2-acetyloxyethoxy)ethoxy]ethyl acetate	CC(=O)OCCOCCOCCOC(=O)C	negative
308	111-27-3	HEXAN-1-OL	CCCCCCO	negative
309	111-40-0	N-(2-aminoethyl)ethane-1,2-diamine	NCCNCCN	negative
310	111-41-1	2-(2-Aminoethylamino)ethanol	NCCNCCO	negative
311	111-42-2	2-(2-Hydroxyethylamino)ethanol	OCCNCCO	negative
312	111-44-4	1-chloro-2-(2-chloroethoxy)ethane	ClCCOCCCl	negative
313	111-46-6	2-(2-Hydroxyethoxy)ethanol	OCCOCCO	negative
314	111-48-8	2-(2-hydroxyethylsulfanyl)ethanol	OCCSCCO	negative
315	1115-20-4	(3-hydroxy-2,2-dimethylpropyl) 3-hydroxy-2,2-dimethylpropanoate	CC(C)(CO)COC(=O)C(C)(C)CO	negative
316	111-76-2	2-Butoxyethanol	CCCCOCCO	negative
317	111-78-4	(1Z,5Z)-cycloocta-1,5-diene	C1CC=CCCC=C1	negative
318	111-87-5	OCTAN-1-OL	CCCCCCCCO	negative
319	111-91-1	1-chloro-2-(2-chloroethoxymethoxy)ethane	ClCCOCOCCCl	negative
320	111-92-2	N-butylbutan-1-amine	CCCCNCCCC	negative
321	1119-40-0	Dimethyl pentanedioate	COC(=O)CCCC(=O)OC	negative
322	1120-21-4	Undecane	CCCCCCCCCCC	negative
323	1120-36-1	tetradec-1-ene	CCCCCCCCCCCCC=C	negative
324	112-07-2	2-Butoxyethyl acetate	CCCCOCCOC(=O)C	negative
325	112-15-2	2-(2-Ethoxyethoxy)ethyl acetate	CCOCCOCCOC(=O)C	negative
326	112-38-9	Undec-10-enoic acid	OC(=O)CCCCCCCCC=C	negative
327	112-41-4	dodec-1-ene	CCCCCCCCCCC=C	negative
328	112-45-8	undec-10-enal	C=CCCCCCCCCC=O	negative
329	112-53-8	dodecan-1-ol	CCCCCCCCCCCCO	negative
330	112-55-0	Dodecane-1-thiol	CCCCCCCCCCCCS	negative
331	112-59-4	2-(2-hexoxyethoxy)ethanol	CCCCCCOCCOCCO	negative
332	112-88-9	octadec-1-ene	CCCCCCCCCCCCCCCCC=C	negative
333	112-92-5	Octadecan-1-ol	CCCCCCCCCCCCCCCCCCO	negative
334	1134-23-2	ethyl (cyclohexyl-ethylamino)methanethioate	CCSC(=O)N(CC)C1CCCCC1	negative
335	115-11-7	2-methylprop-1-ene	CC(=C)C	negative
336	117-81-7	bis(2-ethylhexyl) benzene-1,2-dicarboxylate	CCCCC(CC)COC(=O)c1ccccc1C(=O)OCC(CC)CCCC	negative
337	118-60-5	2-Ethylhexyl 2-hydroxybenzoate	CCCCC(CC)COC(=O)c1ccccc1O	negative
338	119-47-1	2-tert-butyl-6-[(3-tert-butyl-2-hydroxy-5-methylphenyl)methyl]-4-methylphenol	Cc1cc(Cc2cc(C)cc(c2O)C(C)(C)C)c(O)c(c1)C(C)(C)C	negative
339	119-53-9	2-hydroxy-1,2-di(phenyl)ethanone	OC(C(=O)c1ccccc1)c2ccccc2	negative
340	119-61-9	di(phenyl)methanone	O=C(c1ccccc1)c2ccccc2	negative
341	119-64-2	1,2,3,4-Tetrahydronaphthalene	C1CCc2ccccc2C1	negative
342	119-80-2	2-(2-carboxyphenyl)disulfanylbenzoic acid	OC(=O)c1ccccc1SSc2ccccc2C(=O)O	negative
343	120-87-6	9,10-Dihydroxyoctadecanoic acid	CCCCCCCCC(O)C(O)CCCCCCCC(=O)O	negative
344	121158-58-5	4-(3,4,5-trimethylheptyl)phenol	CCC(C)C(C)C(C)CCc1ccc(O)cc1	negative
345	121-32-4	3-Ethoxy-4-hydroxybenzaldehyde	CCOc1cc(C=O)ccc1O	negative
346	122-20-3	1-(bis(2-hydroxypropyl)amino)propan-2-ol	CC(O)CN(CC(C)O)CC(C)O	negative
347	1222-05-5	4,6,6,7,8,8-hexamethyl-1,3,4,7-tetrahydrocyclopenta[g]isochromene	CC1COCc2cc3c(cc12)C(C)(C)C(C)C3(C)C	negative
348	122-52-1	Triethyl phosphite	CCOP(OCC)OCC	negative
349	122-60-1	2-(Phenoxymethyl)oxirane	C(Oc1ccccc1)C2CO2	negative
350	122-99-6	2-(phenoxy)ethanol	OCCOc1ccccc1	negative
351	123-35-3	7-methyl-3-methylideneocta-1,6-diene	CC(=CCCC(=C)C=C)C	negative
352	123-38-6	propanal	CCC=O	negative
353	123-51-3	3-Methylbutan-1-ol	CC(C)CCO	negative
354	123-91-1	1,4-Dioxane	C1COCCO1	negative
355	124-18-5	Decane	CCCCCCCCCC	negative
356	125-12-2	[(1S,4R,6S)-1,7,7-trimethyl-6-bicyclo[2.2.1]heptanyl] acetate	CC(=O)OC1CC2CCC1(C)C2(C)C	negative
357	126-07-8	(2,5')-7-chloro-3',4,6-trimethoxy-5'-methylspiro[1-benzofuran-2,4'-cyclohexane]-1',3-dione	COC1CC(=O)CC(C)C12Oc3c(Cl)c(OC)cc(OC)c3C2=O	negative
358	127-18-4	1,1,2,2-Tetrachloroethene	ClC(=C(Cl)Cl)Cl	negative
359	12789-03-6	Chlordane	ClC1CC2C(C1Cl)C3(Cl)C(=C(Cl)C2(Cl)C3(Cl)Cl)Cl	negative
360	13122-18-4	tert-butyl 3,5,5-trimethylhexaneperoxoate	CC(CC(=O)OOC(C)(C)C)CC(C)(C)C	negative
361	1330-86-5	bis(6-methylheptyl) hexanedioate	CC(C)CCCCCOC(=O)CCCCC(=O)OCCCCCC(C)C	negative
362	1338-24-5	3-(3-ethylcyclopentyl)propanoic acid	CCC1CCC(CCC(=O)O)C1	negative
363	133-90-4	3-Amino-2,5-dichlorobenzoic acid	Nc1cc(Cl)cc(C(=O)O)c1Cl	negative
364	135-57-9	N-[2-[2-(benzoylamino)phenyl]disulfanylphenyl]benzamide	O=C(Nc1ccccc1SSc2ccccc2NC(=O)c3ccccc3)c4ccccc4	negative
365	135-68-2	4-(4-chlorophenyl)aniline	Nc1ccc(cc1)c2ccc(Cl)cc2	negative
366	140-11-4	Phenylmethyl acetate	CC(=O)OCc1ccccc1	negative
367	140-88-5	ethyl prop-2-enoate	CCOC(=O)C=C	negative
368	141-43-5	2-aminoethanol	NCCO	negative
369	141-78-6	Ethyl acetate	CCOC(=O)C	negative
370	142-90-5	dodecyl 2-methylprop-2-enoate	CCCCCCCCCCCCOC(=O)C(=C)C	negative
371	14858-73-2	Bis(2-ethylhexyl) carbonate	CCCCC(CC)COC(=O)OCC(CC)CCCC	negative
372	149-57-5	2-Ethylhexanoic acid	CCCCC(CC)C(=O)O	negative
373	150-78-7	1,4-Dimethoxybenzene	COc1ccc(OC)cc1	negative
374	150-84-5	3,7-dimethyloct-6-enyl acetate	CC(CCOC(=O)C)CCC=C(C)C	negative
375	1634-04-4	2-Methoxy-2-methylpropane	COC(C)(C)C	negative
376	16495-13-9	(2S)-2-(phenylmethoxymethyl)oxirane	C(OCc1ccccc1)C2CO2	negative
377	1667-11-4	1-(chloromethyl)-4-phenylbenzene	ClCc1ccc(cc1)c2ccccc2	negative
378	16958-92-2	Ditridecyl hexanedioate	CCCCCCCCCCCCCOC(=O)CCCCC(=O)OCCCCCCCCCCCCC	negative
379	1761-71-3	4-[(4-aminocyclohexyl)methyl]cyclohexan-1-amine	NC1CCC(CC2CCC(N)CC2)CC1	negative
380	189-92-4	3-Azabenzo(d)pyrene	c1ccc2c(c1)cc3ccc4ccnc5ccc2c3c45	negative
381	19141-39-0	(R)-1-Chloro-2-propanol	CC(O)CCl	negative
382	19592-55-3	10,13-dimethyl-17-(2-methyl-1,3-dioxolan-2-yl)spiro[1,2,4,9,11,12,14,15,16,17-decahydrocyclopenta[a]phenanthrene-3,2'-1,3-dioxolane]	CC12CCC3C(=CC=C4CC5(CCC34C)OCCO5)C1CCC2C6(C)OCCO6	negative
383	20030-30-2	2,5,6-trimethylcyclohex-2-en-1-one	CC1CC=C(C)C(=O)C1C	negative
384	74-96-4	Bromoethane	CCBr	negative
385	20193-20-8	ethyl-propylazanium	CCCNCC	negative
386	2111-75-3	4-prop-1-en-2-ylcyclohexene-1-carbaldehyde	CC(=C)C1CCC(=CC1)C=O	negative
387	2146-71-6	ethenyl dodecanoate	CCCCCCCCCCCC(=O)OC=C	negative
388	2156-71-0	1-Chloropiperidine	ClN1CCCCC1	negative
389	218-01-9	Chrysene	c1ccc2c(c1)ccc3c4ccccc4ccc23	negative
390	2182-55-0	ethenoxycyclohexane	C=COC1CCCCC1	negative
391	2186-92-7	1-(dimethoxymethyl)-4-methoxybenzene	COC(OC)c1ccc(OC)cc1	negative
392	2226-96-2	4-Hydroxy-2,2,6,6-tetramethyl-piperidinooxy	CC1(C)CC(O)CC(C)(C)N1[O]	negative
393	2280-44-6	6-(hydroxymethyl)oxane-2,3,4,5-tetrol	OCC1OC(O)C(O)C(O)C1O	negative
394	2402-79-1	2,3,5,6-Tetrachloropyridine	Clc1cc(Cl)c(Cl)nc1Cl	negative
395	2403-88-5	2,2,6,6-Tetramethylpiperidin-4-ol	CC1(C)CC(O)CC(C)(C)N1	negative
396	24199-46-0	6-Methyloct-5-en-2-one	CCC(=CCCC(=O)C)C	negative
397	2432-99-7	11-Aminoundecanoic acid	NCCCCCCCCCCC(=O)O	negative
398	24851-98-7	methyl 2-(3-oxo-2-pentylcyclopentyl)acetate	CCCCCC1C(CC(=O)OC)CCC1=O	negative
399	2500-88-1	1-octadecyldisulfanyloctadecane	CCCCCCCCCCCCCCCCCCSSCCCCCCCCCCCCCCCCCC	negative
400	25265-71-8	1-(1-hydroxypropoxy)propan-1-ol	CCC(O)OC(O)CC	negative
401	25265-77-4	(3-hydroxy-2,2,4-trimethylpentyl) 2-methylpropanoate	CC(C)C(O)C(C)(C)COC(=O)C(C)C	negative
402	25377-83-7	(E)-Oct-3-ene	CCCCC=CCC	negative
403	25513-64-8	2,2,4-Trimethylhexane-1,6-diamine	CC(CCN)CC(C)(C)CN	negative
404	25584-83-2	3-hydroxypropyl prop-2-enoate	OCCCOC(=O)C=C	negative
405	26748-41-4	tert-butyl 7,7-dimethyloctaneperoxoate	CC(C)(C)CCCCCC(=O)OOC(C)(C)C	negative
406	2687-96-9	1-dodecylpyrrolidin-2-one	CCCCCCCCCCCCN1CCCC1=O	negative
407	26898-17-9	1-methyl-2,3-bis(phenylmethyl)benzene	Cc1cccc(Cc2ccccc2)c1Cc3ccccc3	negative
408	26952-14-7	hexadec-1-ene	CCCCCCCCCCCCCCC=C	negative
409	27458-93-1	16-Methylheptadecan-1-ol	CC(C)CCCCCCCCCCCCCCCO	negative
410	27776-01-8	1-methyl-2-(phenylmethyl)benzene	Cc1ccccc1Cc2ccccc2	negative
411	280-57-9	1,4-Diazabicyclo[2.2.2]octane	C1CN2CCN1CC2	negative
412	2867-47-2	2-dimethylaminoethyl 2-methylprop-2-enoate	CN(C)CCOC(=O)C(=C)C	negative
413	28961-43-5	2-[2,2-bis(2-prop-2-enoyloxyethoxymethyl)butoxy]ethyl prop-2-enoate	CCC(COCCOC(=O)C=C)(COCCOC(=O)C=C)COCCOC(=O)C=C	negative
414	29578-05-0	L-a-Alanine-N,N-diacetic acid	OC(=O)CN(CC(=O)O)CC(=O)O	negative
415	29797-40-8	Dichloromethylbenzene	ClC(Cl)c1ccccc1	negative
416	3006-82-4	tert-butyl 2-ethylhexaneperoxoate	CCCCC(CC)C(=O)OOC(C)(C)C	negative
417	3033-62-3	2-(2-dimethylaminoethoxy)-N,N-dimethylethanamine	CN(C)CCOCCN(C)C	negative
418	309-00-2	Aldrin	ClC1=C(Cl)C2(Cl)C3C4CC(C=C4)C3C1(Cl)C2(Cl)Cl	negative
419	3115-49-9	2-(4-nonylphenoxy)acetic acid	CCCCCCCCCc1ccc(OCC(=O)O)cc1	negative
420	3173-72-6	1,5-Diisocyanatonaphthalene	O=C=Nc1cccc2c(cccc12)N=C=O	negative
421	32360-05-7	octadecyl 2-methylprop-2-enoate	CCCCCCCCCCCCCCCCCCOC(=O)C(=C)C	negative
422	3296-90-0	2,2-Bis(bromomethyl)propane-1,3-diol	OCC(CO)(CBr)CBr	negative
423	34256-82-1	2-Chloro-N-(ethoxymethyl)-N-(2-ethyl-6-methylphenyl)acetamide	CCOCN(C(=O)CCl)c1c(C)cccc1CC	negative
424	34443-12-4	2-ethylhexyl (2-methylpropan-2-yl)oxy carbonate	CCCCC(CC)COC(=O)OOC(C)(C)C	negative
425	3634-83-1	1,3-Bis(isocyanatomethyl)benzene	O=C=NCc1cccc(CN=C=O)c1	negative
426	3717-40-6	N,N-dimethyladamantan-1-amine	CN(C)C12CC3CC(CC(C3)C1)C2	negative
427	38888-98-1	(phenylethyl)-Benzene	CC(c1ccccc1)c2ccccc2	negative
428	41438-38-4	diethyl pyridine-2,4-dicarboxylate	CCOC(=O)c1ccnc(c1)C(=O)OCC	negative
429	4309-66-4	4-[(E)-2-phenylethenyl]aniline	Nc1ccc(C=Cc2ccccc2)cc1	negative
430	434-07-1	(5,8,9,10,13,14,17)-17-hydroxy-2-(hydroxymethylidene)-10,13,17-trimethyl-1,4,5,6,7,8,9,11,12,14,15,16-dodecahydrocyclopenta[a]phenanthren-3-one	CC1(O)CCC2C3CCC4CC(=O)C(=CO)CC4(C)C3CCC12C	negative
431	4559-86-8	1,1,3,3-Tetrabutylurea	CCCCN(CCCC)C(=O)N(CCCC)CCCC	negative
432	4724-48-5	Octylphosphonic acid	CCCCCCCCP(=O)(O)O	negative
433	4985-85-7	2-(3-aminopropyl-(2-hydroxyethyl)amino)ethanol	NCCCN(CCO)CCO	negative
434	50-23-7	(8,9,10,11,13,14,17)-11,17-dihydroxy-17-(2-hydroxyacetyl)-10,13-dimethyl-2,6,7,8,9,11,12,14,15,16-decahydro-1H-cyclopenta[a]phenanthren-3-one	CC12CCC(=O)C=C1CCC3C4CCC(O)(C(=O)CO)C4(C)CC(O)C23	negative
435	502-44-3	oxepan-2-one	O=C1CCCCCO1	negative
436	50-28-2	(8,9,13,14,17)-13-methyl-6,7,8,9,11,12,14,15,16,17-decahydrocyclopenta[a]phenanthrene-3,17-diol	CC12CCC3C(CCc4cc(O)ccc34)C1CCC2O	negative
437	505-32-8	3,7,11,15-Tetramethylhexadec-1-en-3-ol	CC(C)CCCC(C)CCCC(C)CCCC(C)(O)C=C	negative
438	50-53-3	3-(2-chlorophenothiazin-10-yl)-N,N-dimethylpropan-1-amine	CN(C)CCCN1c2ccccc2Sc3ccc(Cl)cc13	negative
439	50-55-5	Reserpine	COC1C(CC2CN3CCc4c([nH]c5cc(OC)ccc45)C3CC2C1C(=O)OC)OC(=O)c6cc(OC)c(OC)c(OC)c6	negative
440	505-65-7	1,3-Dioxepane	C1CCOCOC1	negative
441	5216-25-1	1-Chloro-4-(trichloromethyl)benzene	Clc1ccc(cc1)C(Cl)(Cl)Cl	negative
442	52408-42-1	[2-hydroxy-3-[4-(2-hydroxy-3-prop-2-enoyloxypropoxy)butoxy]propyl] prop-2-enoate	OC(COCCCCOCC(O)COC(=O)C=C)COC(=O)C=C	negative
443	52408-84-1	3-[2,3-bis(3-prop-2-enoyloxypropoxy)propoxy]propyl prop-2-enoate	C=CC(=O)OCCCOCC(COCCCOC(=O)C=C)OCCCOC(=O)C=C	negative
444	532-27-4	2-Chloro-1-phenylethanone	ClCC(=O)c1ccccc1	negative
445	5332-73-0	3-methoxypropan-1-amine	COCCCN	negative
446	5392-40-5	(2E)-3,7-dimethylocta-2,6-dienal	CC(=CCCC(=CC=O)C)C	negative
447	540-51-2	2-Bromoethanol	OCCBr	negative
448	540-88-5	tert-Butyl acetate	CC(=O)OC(C)(C)C	negative
449	544-01-4	3-methyl-1-(3-methylbutoxy)butane	CC(C)CCOCCC(C)C	negative
450	544-10-5	1-CHLOROHEXANE	CCCCCCCl	negative
451	5464-28-8	1,3-Dioxolan-4-ylmethanol	OCC1COCO1	negative
452	54-85-3	pyridine-4-carbohydrazide	NNC(=O)c1ccncc1	negative
453	556-61-6	methylimino-sulfanylidenemethane	CN=C=S	negative
454	556-82-1	3-Methylbut-2-en-1-ol	CC(=CCO)C	negative
455	55934-93-5	3-[2-(5-ethoxypentan-2-yloxy)ethoxy]-2-methylpropan-1-ol	CCOCCCC(C)OCCOCC(C)CO	negative
456	56-23-5	Tetrachloromethane	ClC(Cl)(Cl)Cl	negative
457	5661-03-0	1,2,3,3a,4,5,6,6a-octahydrocyclopenta[c]pyrrole	C1CC2CNCC2C1	negative
458	57-50-1	(2,3,4,5,6)-2-[(2,3,4,5)-3,4-dihydroxy-2,5-bis(hydroxymethyl)oxolan-2-yl]oxy-6-(hydroxymethyl)oxane-3,4,5-triol	OCC1OC(OC2(CO)OC(CO)C(O)C2O)C(O)C(O)C1O	negative
459	57-57-8	oxetan-2-one	O=C1CCO1	negative
460	57817-89-7	Stevioside	CC12CCCC(C)(C1CCC34CC(=C)C(CCC23)(C4)OC5OC(CO)C(O)C(O)C5OC6OC(CO)C(O)C(O)C6O)C(=O)OC7OC(CO)C(O)C(O)C7O	negative
461	57-83-0	(8,9,10,13,14,17)-17-Acetyl-10,13-dimethyl-1,2,6,7,8,9,11,12,14,15,16,17-dodecahydrocyclopenta[a]phenanthren-3-one	CC(=O)C1CCC2C3CCC4=CC(=O)CCC4(C)C3CCC12C	negative
462	58-22-0	(8,9,10,13,14,17)-17-hydroxy-10,13-dimethyl-1,2,6,7,8,9,11,12,14,15,16,17-dodecahydrocyclopenta[a]phenanthren-3-one	CC12CCC3C(CCC4=CC(=O)CCC34C)C1CCC2O	negative
463	58306-30-2	methyl N-[N-[2-[(2-methoxyacetyl)amino]-4-phenylsulfanylphenyl]-N'-methoxycarbonylcarbamimidoyl]carbamate	COCC(=O)Nc1cc(Sc2ccccc2)ccc1NC(=NC(=O)OC)NC(=O)OC	negative
464	585-88-6	4-[3,4,5-trihydroxy-6-(hydroxymethyl)oxan-2-yl]oxyhexane-1,2,3,5,6-pentol	OCC(O)C(O)C(OC1OC(CO)C(O)C(O)C1O)C(O)CO	negative
465	58-89-9	1,2,3,4,5,6-Hexachlorocyclohexane	ClC1C(Cl)C(Cl)C(Cl)C(Cl)C1Cl	negative
466	590-86-3	3-Methylbutanal	CC(C)CC=O	negative
467	592-41-6	hex-1-ene	CCCCC=C	negative
468	59-67-6	Pyridine-3-carboxylic acid	OC(=O)c1cccnc1	negative
469	60-24-2	2-sulfanylethanol	OCCS	negative
470	60-29-7	Ethoxyethane	CCOCC	negative
471	60435-70-3	2-methylheptan-1-ol	CCCCCC(C)CO	negative
472	622-40-2	2-morpholin-4-ylethanol	OCCN1CCOCC1	negative
473	623-40-5	(NZ)-N-pentan-2-ylidenehydroxylamine	CCCC(=NO)C	negative
474	624-48-6	dimethyl (Z)-but-2-enedioate	COC(=O)C=CC(=O)OC	negative
475	62-56-6	Thiourea	NC(=S)N	negative
476	627-93-0	Dimethyl hexanedioate	COC(=O)CCCCC(=O)OC	negative
477	629-50-5	Tridecane	CCCCCCCCCCCCC	negative
478	629-59-4	Tetradecane	CCCCCCCCCCCCCC	negative
479	63500-71-0	4-methyl-2-(2-methylpropyl)oxan-4-ol	CC(C)CC1CC(C)(O)CCO1	negative
480	637-92-3	2-Ethoxy-2-methylpropane	CCOC(C)(C)C	negative
481	6425-39-4	4-[2-(2-morpholin-4-ylethoxy)ethyl]morpholine	C(CN1CCOCC1)OCCN2CCOCC2	negative
482	646-04-8	pent-2-ene	CCC=CC	negative
483	646-06-0	1,3-DIOXOLANE	C1COCO1	negative
484	646-25-3	decane-1,10-diamine	NCCCCCCCCCCN	negative
485	661-19-8	docosan-1-ol	CCCCCCCCCCCCCCCCCCCCCCO	negative
486	66455-17-2	DECAN-1-OL	CCCCCCCCCCO	negative
487	66492-51-1	(5-ethyl-1,3-dioxan-5-yl)methyl prop-2-enoate	CCC1(COC(=O)C=C)COCOC1	negative
488	67-63-0	Propan-2-ol	CC(C)O	negative
489	67-66-3	Chloroform	ClC(Cl)Cl	negative
490	67774-74-7	Undecylbenzene	CCCCCCCCCCCc1ccccc1	negative
491	682-09-7	2,2-bis(prop-2-enoxymethyl)butan-1-ol	CCC(CO)(COCC=C)COCC=C	negative
492	682-11-1	2-ethyl-2-(prop-2-enoxymethyl)propane-1,3-diol	CCC(CO)(CO)COCC=C	negative
493	68411-27-8	Dodecyl benzoate	CCCCCCCCCCCCOC(=O)c1ccccc1	negative
494	68475-60-5	Pentane	CCCCC	negative
495	68476-49-3	PROPANE	CCC	negative
496	68515-49-1	bis(8-methylnonyl) benzene-1,2-dicarboxylate	CC(C)CCCCCCCOC(=O)c1ccccc1C(=O)OCCCCCCCC(C)C	negative
497	686-31-7	2-methylbutan-2-yl 2-ethylhexaneperoxoate	CCCCC(CC)C(=O)OOC(C)(C)CC	negative
498	68955-53-3	10,10-dimethylundecan-1-amine	CC(C)(C)CCCCCCCCCN	negative
499	693-23-2	Dodecanedioic acid	OC(=O)CCCCCCCCCCC(=O)O	negative
500	7069-42-3	[3,7-dimethyl-9-(2,6,6-trimethyl-1-cyclohexenyl)nona-2,4,6,8-tetraenyl] propanoate	CCC(=O)OCC=C(C)C=CC=C(C)C=CC1=C(C)CCCC1(C)C	negative
501	7195-44-0	bis(oxiran-2-ylmethyl) benzene-1,4-dicarboxylate	O=C(OCC1CO1)c2ccc(cc2)C(=O)OCC3CO3	negative
502	7212-44-4	3,7,11-Trimethyldodeca-1,6,10-trien-3-ol	CC(=CCCC(=CCCC(C)(O)C=C)C)C	negative
503	7235-40-7	1,3,3-trimethyl-2-[3,7,12,16-tetramethyl-18-(2,6,6-trimethyl-1-cyclohexenyl)octadeca-1,3,5,7,9,11,13,15,17-nonaenyl]cyclohexene	CC(=CC=CC=C(C)C=CC=C(C)C=CC1=C(C)CCCC1(C)C)C=CC=C(C)C=CC2=C(C)CCCC2(C)C	negative
504	75-00-3	Chloroethane	CCCl	negative
505	75-18-3	methylsulfanylmethane	CSC	negative
506	75-27-4	bromo-dichloromethane	ClC(Cl)Br	negative
507	7529-22-8	4-methyl-4-oxidomorpholin-4-ium	C[N+]1([O-])CCOCC1	negative
508	75-66-1	2-Methylpropane-2-thiol	CC(C)(C)S	negative
509	7570-36-7	4-[(E)-2-(4-chlorophenyl)ethenyl]aniline	Nc1ccc(C=Cc2ccc(Cl)cc2)cc1	negative
510	75782-87-5	tetradecan-1-ol	CCCCCCCCCCCCCCO	negative
511	7659-86-1	2-ethylhexyl 2-sulfanylacetate	CCCCC(CC)COC(=O)CS	negative
512	768-94-5	adamantan-1-amine	NC12CC3CC(CC(C3)C1)C2	negative
513	115-84-4	2-butyl-2-ethylpropane-1,3-diol	CCCCC(CC)(CO)CO	negative
514	77439-76-0	3-chloro-4-(dichloromethyl)-5-hydroxy-5H-furan-2-one	OC1OC(=O)C(=C1C(Cl)Cl)Cl	negative
515	7747-35-5	7a-ethyl-1,3,5,7-tetrahydro-[1,3]oxazolo[3,4-c][1,3]oxazole	CCC12COCN1COC2	negative
516	77-73-6	Dicyclopentadiene	C1C=CC2C3CC(C=C3)C12	negative
517	7782-99-2	Sulfurous acid	OS(=O)O	negative
518	7803-49-8	HYDROXYLAMINE	NO	negative
519	78-27-3	1-Ethynylcyclohexan-1-ol	OC1(CCCCC1)C#C	negative
520	78-86-4	2-CHLOROBUTANE	CCC(C)Cl	negative
521	78-93-3	butan-2-one	CCC(=O)C	negative
522	79-16-3	N-Methylacetamide	CNC(=O)C	negative
523	79-20-9	METHYL ACETATE	COC(=O)C	negative
524	79243-67-7	(1,5,8,9,10,13,14,17)-17-hydroxy-1,10,13-trimethyl-17-propyl-2,4,5,6,7,8,9,11,12,14,15,16-dodecahydro-1H-cyclopenta[a]phenanthren-3-one	CCCC1(O)CCC2C3CCC4CC(=O)CC(C)C4(C)C3CCC12C	negative
525	79-77-6	4-(2,6,6-trimethyl-1-cyclohexenyl)but-3-en-2-one	CC(=O)C=CC1=C(C)CCCC1(C)C	negative
526	79-81-2	[(2E,4E,6E,8E)-3,7-dimethyl-9-(2,6,6-trimethyl-1-cyclohexenyl)nona-2,4,6,8-tetraenyl] hexadecanoate	CCCCCCCCCCCCCCCC(=O)OCC=C(C)C=CC=C(C)C=CC1=C(C)CCCC1(C)C	negative
527	79-92-5	6,6-dimethyl-5-methylidenebicyclo[2.2.1]heptane	CC1(C)C2CCC(C2)C1=C	negative
528	80-54-6	3-(4-tert-butylphenyl)-2-methylpropanal	CC(Cc1ccc(cc1)C(C)(C)C)C=O	negative
529	80-56-8	4,7,7-trimethylbicyclo[3.1.1]hept-3-ene	CC1=CCC2CC1C2(C)C	negative
530	80-62-6	methyl 2-methylprop-2-enoate	COC(=O)C(=C)C	negative
531	821-11-4	but-2-ene-1,4-diol	OCC=CCO	negative
532	822-06-0	1,6-Diisocyanatohexane	O=C=NCCCCCCN=C=O	negative
533	84-65-1	anthracene-9,10-dione	O=C1c2ccccc2C(=O)c3ccccc13	negative
534	84731-70-4	Bis(2-ethylhexyl) cyclohexane-1,4-dicarboxylate	CCCCC(CC)COC(=O)C1CCC(CC1)C(=O)OCC(CC)CCCC	negative
535	86089-17-0	8-ethylundecan-1-amine	CCCC(CC)CCCCCCCN	negative
536	872-50-4	1-methylpyrrolidin-2-one	CN1CCCC1=O	negative
537	873-94-9	3,3,5-Trimethylcyclohexan-1-one	CC1CC(=O)CC(C)(C)C1	negative
538	87-69-4	2,3-Dihydroxybutanedioic acid	OC(C(O)C(=O)O)C(=O)O	negative
539	87-99-0	pentane-1,2,3,4,5-pentol	OCC(O)C(O)C(O)CO	negative
540	88-27-7	2,6-ditert-butyl-4-(dimethylaminomethyl)phenol	CN(C)Cc1cc(c(O)c(c1)C(C)(C)C)C(C)(C)C	negative
541	88-66-4	1-Chloro-2-(dichloromethyl)benzene	ClC(Cl)c1ccccc1Cl	negative
542	9010-98-4	Polychloroprene	ClC(=C)C=C	negative
543	91-17-8	1,2,3,4,4a,5,6,7,8,8a-decahydronaphthalene	C1CCC2CCCCC2C1	negative
544	91273-04-0	2-ethyl-N-(2-ethylhexyl)-N-(1,2,4-triazol-1-ylmethyl)hexan-1-amine	CCCCC(CC)CN(CC(CC)CCCC)Cn1cncn1	negative
545	91-76-9	6-Phenyl-1,3,5-triazine-2,4-diamine	Nc1nc(N)nc(n1)c2ccccc2	negative
546	92-52-4	Biphenyl	c1ccc(cc1)c2ccccc2	negative
547	927-07-1	tert-butyl 2,2-dimethylpropaneperoxoate	CC(C)(C)OOC(=O)C(C)(C)C	negative
548	930-55-2	1-Nitrosopyrrolidine	O=NN1CCCC1	negative
549	93-54-9	1-Phenylpropan-1-ol	CCC(O)c1ccccc1	negative
550	93-76-5	2-(2,4,5-trichlorophenoxy)acetic acid	OC(=O)COc1cc(Cl)c(Cl)cc1Cl	negative
551	938-73-8	2-Ethoxybenzamide	CCOc1ccccc1C(=O)N	negative
552	93924-11-9	hexacos-1-ene	CCCCCCCCCCCCCCCCCCCCCCCCC=C	negative
553	94108-97-1	[2-[2,2-bis(prop-2-enoyloxymethyl)butoxymethyl]-2-(prop-2-enoyloxymethyl)butyl] prop-2-enoate	CCC(COCC(CC)(COC(=O)C=C)COC(=O)C=C)(COC(=O)C=C)COC(=O)C=C	negative
554	947-19-3	(1-hydroxycyclohexyl)-phenylmethanone	OC1(CCCCC1)C(=O)c2ccccc2	negative
555	94-96-2	2-Ethylhexane-1,3-diol	CCCC(O)C(CC)CO	negative
556	95-47-6	1,2-Dimethylbenzene	Cc1ccccc1C	negative
557	95-50-1	1,2-Dichlorobenzene	Clc1ccccc1Cl	negative
558	95-63-6	1,2,4-Trimethylbenzene	Cc1ccc(C)c(C)c1	negative
559	95962-14-4	2-[2-(4-methyl-1-cyclohex-3-enyl)propyl]cyclopentan-1-one	CC(CC1CCCC1=O)C2CCC(=CC2)C	negative
560	96-22-0	pentan-3-one	CCC(=O)CC	negative
561	96-24-2	3-Chloropropane-1,2-diol	OCC(O)CCl	negative
562	96-26-4	1,3-Dihydroxypropan-2-one	OCC(=O)CO	negative
563	96-47-9	2-Methyloxolane	CC1CCCO1	negative
564	96-48-0	oxolan-2-one	O=C1CCCO1	negative
565	97-90-5	2-(2-methylprop-2-enoyloxy)ethyl 2-methylprop-2-enoate	CC(=C)C(=O)OCCOC(=O)C(=C)C	negative
566	98-82-8	(1-Methylethyl)benzene	CC(C)c1ccccc1	negative
567	98-94-2	N,N-Dimethylcyclohexanamine	CN(C)C1CCCCC1	negative
568	994-05-8	2-Methoxy-2-methylbutane	CCC(C)(C)OC	negative
569	99607-70-2	heptan-2-yl 2-(5-chloroquinolin-8-yl)oxyacetate	CCCCCC(C)OC(=O)COc1ccc(Cl)c2cccnc12	negative
570	5634-39-9	[2-(1-iodoethyl)-1,3-dioxolan-4-yl]methanol	CC(I)C1OCC(CO)O1	negative
571	20348-51-0	(Z)-dec-2-ene	CCCCCCCC=CC	negative
572	21340-68-1	methyl 2-[4-(4-chlorophenyl)phenoxy]-2-methylpropanoate	COC(=O)C(C)(C)Oc1ccc(cc1)c2ccc(Cl)cc2	negative
573	2579-20-6	cyclohexane-1,3-diyldimethanamine	NCC1CCCC(CN)C1	negative
574	2855-13-2	3-(aminomethyl)-3,5,5-trimethylcyclohexan-1-amine; 4-methylbenzenesulfonic acid	CC1(C)CC(N)CC(C)(CN)C1	negative
575	480-22-8	anthracene-1,8,9-triol	Oc1cccc2cc3cccc(O)c3c(O)c12	negative
576	25968-74-5	hexadeca-6,10-diene	CCCCCC=CCCC=CCCCCC	negative

## Sheet: external validation
The SMILES string, classification, CAS number and names for the external validation set
No.	CAS	Name	SMILES	Classification
1	60-11-7	N,N-dimethyl-4-phenyldiazenylaniline	CN(C)c1ccc(cc1)N=Nc2ccccc2	positive
2	106-47-8	4-Chloroaniline	Nc1ccc(Cl)cc1	positive
3	1068-57-1	Acetohydrazide	CC(=O)NN	positive
4	15403-45-9	methyl 2-amino-5-(4-amino-3-methoxycarbonylphenyl)benzoate	COC(=O)c1cc(ccc1N)c2ccc(N)c(c2)C(=O)OC	positive
5	1761-71-3	4-[(4-aminocyclohexyl)methyl]cyclohexan-1-amine	Nc1ccc(Cc2ccc(N)cc2)cc1	positive
6	17804-35-2	methyl N-[1-(butylcarbamoyl)benzimidazol-2-yl]carbamate	CCCCNC(=O)n1c(NC(=O)OC)nc2ccccc12	positive
7	210049-12-0	2-Amino-1-methyl-6-phenylimidazo[4,5-b]pyridine-2-14C	Cn1c(N)nc2ncc(cc12)c3ccccc3	positive
8	23357-46-2	1,2,3,4-Tetrahydro-1-aminonaphthalene	Nc1cccc2ccccc12	positive
9	3365-85-3	4-[4-(4-aminophenyl)phenyl]aniline	Nc1ccc(cc1)c2ccc(cc2)c3ccc(N)cc3	positive
10	37753-10-9	2-[[3-(2-chloroethyl)-2-oxo-1-oxa-3-aza-2$l^{5}-phosphacyclohex-2-yl]amino]ethyl methanesulfonate	CS(=O)(=O)OCCNP1(=O)OCCCN1CCCl	positive
11	4342-03-4	5-(3,3-Dimethyl-1-triazenyl)imidazole-4-carboxamide	CN(C)NN=C1N=CN=C1C(=O)N	positive
12	495-48-7	oxido-phenyl-phenyliminoazanium	O=[N+]([N-]c1ccccc1)c2ccccc2	positive
13	52315-07-8	[cyano-[3-(phenoxy)phenyl]methyl] 3-(2,2-dichloroethenyl)-2,2-dimethylcyclopropane-1-carboxylate	CC1(C)C(C=C(Cl)Cl)C1C(=O)OC(C#N)c2cccc(Oc3ccccc3)c2	positive
14	52820-00-5	[cyano-[3-(phenoxy)phenyl]methyl] 3-(2,2-dibromoethenyl)-2,2-dimethylcyclopropane-1-carboxylate	CC1(C)C(C=C(Br)Br)C1C(=O)OC(C#N)c2cccc(Oc3ccccc3)c2	positive
15	54-62-6	2-[[4-[(2,4-diaminopteridin-6-yl)methylamino]benzoyl]amino]pentanedioic acid	Nc1nc(N)c2nc(CNc3ccc(cc3)C(=O)NC(CCC(=O)O)C(=O)O)cnc2n1	positive
16	548-83-4	3,5,7-trihydroxy-2-phenylchromen-4-one	OC1=C(Oc2cc(O)cc(O)c2C1=O)c3ccccc3	positive
17	55-21-0	Benzamide	NC(=O)c1ccccc1	positive
18	5694-00-8	Oxirane-2-carboxamide	NC(=O)C1CO1	positive
19	60-09-3	4-Aminoazobenzene	Nc1ccc(cc1)N=Nc2ccccc2	positive
20	63885-23-4	(E)-2-ethyl-1-nitro-1-nitrosoguanidine	CCN=C(N)N(N=O)[N+](=O)[O-]	positive
21	64037-54-3	3,4-Dichlorobut-1-ene	ClCC(Cl)C=C	positive
22	68-76-8	2,3,5-tris(aziridin-1-yl)cyclohexa-2,5-diene-1,4-dione	O=C1C=C(N2CC2)C(=O)C(=C1N3CC3)N4CC4	positive
23	7203-90-9	N-(4-chlorophenyl)diazenyl-N-methylmethanamine	CN(C)N=Nc1ccc(Cl)cc1	positive
24	74-31-7	N,N'-di(phenyl)benzene-1,4-diamine	N(c1ccccc1)c2ccc(Nc3ccccc3)cc2	positive
25	842-07-9	1-(phenylhydrazinylidene)naphthalen-2-one	O=C1C=Cc2ccccc2C1=NNc3ccccc3	positive
26	765-34-4	Oxirane-2-carbaldehyde	O=CC1CO1	positive
27	14684-01-6	4-amino-3-[[4-[4-[(1-amino-4-sulfonaphthalen-2-yl)diazenyl]phenyl]phenyl]diazenyl]naphthalene-1-sulfonic acid	Nc1c(cc(c2ccccc12)S(=O)(=O)O)N=Nc3ccc(cc3)c4ccc(cc4)N=Nc5cc(c6ccccc6c5N)S(=O)(=O)O	positive
28	4719-04-4	2-[3,5-bis(2-hydroxyethyl)-1,3,5-triazinan-1-yl]ethanol	OCCN1CN(CCO)CN(CCO)C1	negative
29	100-51-6	phenylmethanol	OCc1ccccc1	negative
30	105-08-8	[4-(hydroxymethyl)cyclohexyl]methanol	OCC1CCC(CO)CC1	negative
31	108-38-3	1,3-Dimethylbenzene	Cc1cccc(C)c1	negative
32	108-67-8	1,3,5-Trimethylbenzene	Cc1cc(C)cc(C)c1	negative
33	108-74-7	1,3,5-trimethyl-1,3,5-triazinane	CN1CN(C)CN(C)C1	negative
34	108-88-3	methylbenzene	Cc1ccccc1	negative
35	109-87-5	Dimethoxymethane	COCOC	negative
36	110-89-4	Piperidine	C1CCNCC1	negative
37	111-66-0	oct-1-ene	CCCCCCC=C	negative
38	112-40-3	Dodecane	CCCCCCCCCCCC	negative
39	112-42-5	undecan-1-ol	CCCCCCCCCCCO	negative
40	115-07-1	prop-1-ene	CC=C	negative
41	1321-74-0	1,2-di(ethenyl)benzene	C=Cc1ccccc1C=C	negative
42	13475-82-6	2,2,4,6,6-PENTAMETHYLHEPTANE	CC(CC(C)(C)C)CC(C)(C)C	negative
43	143-29-3	1-[2-[2-[2-(2-butoxyethoxy)ethoxymethoxy]ethoxy]ethoxy]butane	CCCCOCCOCCOCOCCOCCOCCCC	negative
44	1746-01-6	2,3,7,8-tetrachlorooxanthrene	Clc1cc2Oc3cc(Cl)c(Cl)cc3Oc2cc1Cl	negative
45	2416-94-6	2,3,6-TRIMETHYLPHENOL	Cc1ccc(C)c(O)c1C	negative
46	25340-17-4	1,2-DIETHYLBENZENE	CCc1ccccc1CC	negative
47	29171-20-8	3,7-Dimethyloct-6-en-1-yn-3-ol	CC(=CCCC(C)(O)C#C)C	negative
48	35265-04-4	2-(butan-2-ylamino)ethanol	CCC(C)NCCO	negative
49	471-01-2	3,5,5-Trimethylcyclohex-3-en-1-one	CC1=CC(C)(C)CC(=O)C1	negative
50	51-03-6	Piperonyl butoxide	CCCCOCCOCCOCc1cc2OCOc2cc1CCC	negative
51	517-28-2	(6a,11b)-7,11b-dihydro-6H-indeno[2,1-c]chromene-3,4,6a,9,10-pentol	Oc1cc2CC3(O)COc4c(O)c(O)ccc4C3c2cc1O	negative
52	5614-37-9	Cyclopentyl methyl ether	COC1CCCC1	negative
53	5635-50-7	4-[4-(4-hydroxyphenyl)hexan-3-yl]phenol	CCC(C(CC)c1ccc(O)cc1)c2ccc(O)cc2	negative
54	56-45-1	2-Amino-3-hydroxypropanoic acid	NC(CO)C(=O)O	negative
55	611-19-8	1-Chloro-2-(chloromethyl)benzene	ClCc1ccccc1Cl	negative
56	70356-09-1	1-(4-tert-butylphenyl)-3-(4-methoxyphenyl)propane-1,3-dione	COc1ccc(cc1)C(=O)CC(=O)c2ccc(cc2)C(C)(C)C	negative
57	71048-82-3	(E)-1-(2,6,6-trimethyl-1-cyclohex-3-enyl)but-2-en-1-one	CC=CC(=O)C1C(C)C=CCC1(C)C	negative
58	781-43-1	9,10-Dimethylanthracene	Cc1c2ccccc2c(C)c3ccccc13	negative
59	80584-91-4	6-[[4,6-bis[(6-hydroxy-6-oxohexyl)amino]-1,3,5-triazin-2-yl]amino]hexanoic acid	OC(=O)CCCCCNc1nc(NCCCCCC(=O)O)nc(NCCCCCC(=O)O)n1	negative
60	872-36-6	1,3-Dioxol-2-one	O=C1OC=CO1	negative
61	88-60-8	2-tert-Butyl-5-methylphenol	Cc1ccc(c(O)c1)C(C)(C)C	negative
62	93924-10-8	docos-1-ene	CCCCCCCCCCCCCCCCCCCCC=C	negative
63	94-36-0	benzoyl benzenecarboperoxoate	O=C(OOC(=O)c1ccccc1)c2ccccc2	negative
64	97-88-1	butyl 2-methylprop-2-enoate	CCCCOC(=O)C(=C)C	negative
65	13269-52-8	Trans-3-Hexene	CCC=CCC	negative
