# Supplementary material for: In silico prediction of chemical genotoxicity using machine learning methods and structural alerts
Source: Royal Society of Chemistry journal article supplement (doi:10.1039/c7tx00259a), 2017-12-15
Supplement: c7tx00259a3.pdf [file c7tx00259a3.pdf]

Table SI2: Parameter ranges in grid search for different machine learning methods

|                                            |                                                                                                                             |
|--------------------------------------------|-----------------------------------------------------------------------------------------------------------------------------|
| <b>support vector machine<br/>(SVM)</b>    | kernel = 'rbf'<br>$c = 2^{[-5, -3, -1, 1, 3, 5, 7, 9, 11, 13, 15]}$<br>$\text{gamma} = 2^{[-3, -5, -7, -9, -11, -13, -15]}$ |
| <b>naïve Bayes<br/>(NB)</b>                | None                                                                                                                        |
| <b>k-nearest neighbor<br/>(kNN)</b>        | Number of neighbors = [3, 5, 7, 9, 11, 13, 15]                                                                              |
| <b>C4.5 decision tree<br/>(DT)</b>         | Stop splitting nodes with less instances than 5<br>Limit the depth to 100                                                   |
| <b>random forest<br/>(RF)</b>              | Number of trees = [10, 20, 30, 40, 50, 60, 70, 80, 90, 100]                                                                 |
| <b>artificial neural network<br/>(ANN)</b> | Hidden layer neurons = [5, 10, 15, 20, 25, 30, 35, 40, 45]                                                                  |
