# Supplementary material for: In silico prediction of chemical genotoxicity using machine learning methods and structural alerts
Source: Royal Society of Chemistry journal article supplement (doi:10.1039/c7tx00259a), 2017-12-15
Supplement: c7tx00259a4.xlsx [file c7tx00259a4.xlsx]

## Sheet: Sheet1
Table SI3: The names of the 49 descriptors
No.	class	Descriptor name
1	Burden descriptors	bcute9
2		bcutm2
3		bcutm3
4		bcutm9
5		bcutp1
6		bcutp3
7		bcutp5
8		bcutp9
9		bcutv10
10	CATS descriptors	CATS_AA0
11		CATS_AA1
12		CATS_AA2
13		CATS_AA3
14		CATS_DA0
15		CATS_DD0
16		CATS_DP0
17		CATS_PL2
18		CATS_PL3
19		CATS_PL5
20		CATS_PN1
21		CATS_PP0
22	Basak descriptors	CIC0
23		CIC1
24		CIC2
25		CIC4
26		CIC5
27		IC0
28		IC1
29		IC2
30		SIC0
31		SIC1
32		SIC3
33		SIC4
34		SIC5
35		IC5
36	Constitutional descriptors	ndonr
37		nhet
38		nhev
39		nhyd
40		nnitro
41		nring
42		Aweight
43		nsb
44	MOE-type descriptors	MRVSA6
45		MRVSA8
46		MRVSA9
47		PEOEVSA12
48		VSAEstate7
49		VSAEstate8
