# Supplementary material for: In silico prediction of chemical genotoxicity using machine learning methods and structural alerts
Source: Royal Society of Chemistry journal article supplement (doi:10.1039/c7tx00259a), 2017-12-15
Supplement: c7tx00259a5.xlsx [file c7tx00259a5.xlsx]

## Sheet: fingerprint models
Table SI4: Performance of the models for five-fold cross validation and external validation using different algorithms combined with different fingerprints or descriptors
Performance of 36 binary classification models for the fivefold cross validation using six fingerprints and six modeling methods
Fingerprint	Method	CA	SE	SP	AUC
Estate	ANN	0.865	0.912	0.797	0.927
Estate	DT	0.851	0.891	0.793	0.848
Estate	kNN	0.823	0.923	0.679	0.892
Estate	NB	0.83	0.847	0.806	0.879
Estate	RF	0.818	0.944	0.637	0.912
Estate	SVM	0.872	0.929	0.789	0.93
Ext	ANN	0.833	0.873	0.776	0.908
Ext	DT	0.813	0.817	0.806	0.812
Ext	kNN	0.813	0.944	0.624	0.894
Ext	NB	0.82	0.861	0.759	0.851
Ext	RF	0.851	0.903	0.776	0.93
Ext	SVM	0.865	0.917	0.789	0.926
FP	ANN	0.839	0.87	0.793	0.909
FP	DT	0.786	0.814	0.747	0.779
FP	kNN	0.818	0.926	0.662	0.891
FP	NB	0.799	0.85	0.726	0.845
FP	RF	0.844	0.897	0.768	0.917
FP	SVM	0.877	0.917	0.819	0.928
MACCS	ANN	0.849	0.891	0.789	0.928
MACCS	DT	0.813	0.835	0.781	0.808
MACCS	kNN	0.849	0.906	0.768	0.924
MACCS	NB	0.852	0.885	0.806	0.904
MACCS	RF	0.882	0.841	0.91	0.947
MACCS	SVM	0.872	0.897	0.835	0.931
Pubchem	ANN	0.872	0.906	0.823	0.938
Pubchem	DT	0.793	0.823	0.751	0.787
Pubchem	kNN	0.83	0.906	0.722	0.902
Pubchem	NB	0.833	0.826	0.844	0.849
Pubchem	RF	0.844	0.906	0.755	0.931
Pubchem	SVM	0.889	0.923	0.84	0.948
Sub	ANN	0.839	0.888	0.768	0.92
Sub	DT	0.833	0.855	0.802	0.841
Sub	kNN	0.825	0.914	0.696	0.893
Sub	NB	0.819	0.867	0.751	0.901
Sub	RF	0.773	0.953	0.515	0.912
Sub	SVM	0.863	0.909	0.797	0.925
Performance of the top ten binary classification models for the external validation using six fingerprints and six modeling methods
Fingerprint	Method	CA	SE	SP	AUC
MACCS	RF	0.938	0.947	0.926	0.963
Pubchem	ANN	0.923	0.921	0.926	0.963
Pubchem	SVM	0.908	0.895	0.926	0.98
Estate	ANN	0.892	0.921	0.852	0.952
Estate	SVM	0.892	0.947	0.815	0.963
Ext	SVM	0.892	0.921	0.852	0.944
MACCS	SVM	0.892	0.868	0.926	0.957
FP	SVM	0.862	0.868	0.852	0.924
MACCS	NB	0.862	0.868	0.852	0.937
Sub	SVM	0.846	0.868	0.815	0.943

## Sheet: descriptor models
Performance of the 5 binary classification models for the fivefold cross validation using 49 descriptors
Method	CA	SE	SP	AUC
DT	0.821	0.754	0.866	0.81
kNN	0.859	0.797	0.901	0.932
NB	0.842	0.819	0.858	0.9
RF	0.861	0.845	0.872	0.933
SVM	0.882	0.853	0.901	0.952
Performance of the 5 binary classification models for the external validation using 49 descriptors
Method	CA	SE	SP	AUC
DT	0.844	0.806	0.879	0.843
kNN	0.844	0.774	0.909	0.936
NB	0.859	0.839	0.879	0.9
RF	0.922	0.903	0.939	0.974
SVM	0.891	0.871	0.909	0.954
