# Supplementary figures and images for: In silico prediction of chemical genotoxicity using machine learning methods and structural alerts
Source: Royal Society of Chemistry journal article supplement (doi:10.1039/c7tx00259a), 2017-12-15

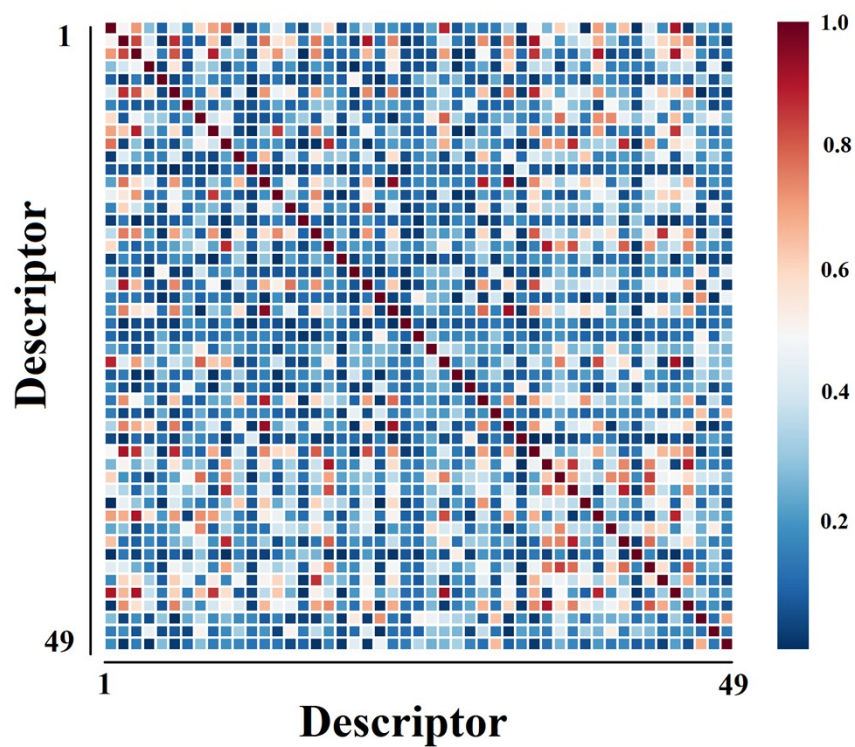

Figure S11. Correlation heat map of 49 descriptors. The average correlation coefficient is 0.26.

Supplement: c7tx00259a1.pdf [file c7tx00259a1.pdf]
